# Supplementary material for: Occupational Risk Factors for Prostate Cancer: A Meta-analysis
Source: PubMed Central journal article supplement — J Cancer Prev. 2019 Jun 30;24(2):91–111. doi: 10.15430/JCP.2019.24.2.91 (PMC6619854; doi:10.15430/jcp.2019.24.2.91), 2019-06-30
Supplement: JCP-24-091_Supple.pdf [file JCP-24-091_Supple.pdf]

**Supplementary Table ST1.** Description of studies examining the association between farmers and agricultural workers and prostate cancer

| Reference                         | Design | Country                 | No. of cases | Measure of risk | Risk | 95% CI    |
|-----------------------------------|--------|-------------------------|--------------|-----------------|------|-----------|
| Andersen 1999 <sup>152</sup>      | Coh    | Scandinavia and Finland | 9,617        | SIR             | 0.96 | 0.94-0.98 |
| Andersson 1996 <sup>153</sup>     | CC     | Sweden                  | 11           | OR              | 0.60 | 0.30-1.20 |
| Bouchardy 2002 <sup>154</sup>     | CC     | Switzerland             | 310          | OR              | 1.10 | 1.00-1.25 |
| Bucchi 2004 <sup>155</sup>        | Coh    | Italy                   | 293          | SMR             | 0.94 | 0.76-1.16 |
| Ewings 1996 <sup>88</sup>         | CC     | United Kingdom          | 36           | OR              | 0.74 | 0.46-1.19 |
| Faustini 1993 <sup>156</sup>      | Coh    | Italy                   | 8            | SMR             | 0.91 | 0.66-1.25 |
| Fragar 2011 <sup>157</sup>        | Coh    | Australia               | 200          | SMR             | 2.40 | 1.70-3.39 |
| Franceschi 1993 <sup>158</sup>    | CC     | Italy                   | 42           | OR              | 0.90 | 0.59-1.37 |
| Gambini 1997 <sup>159</sup>       | Coh    | Italy                   | 19           | SMR             | 0.96 | 0.58-1.59 |
| Ilic 1996 <sup>160</sup>          | CC     | Yugoslavia              | 38           | OR              | 1.09 | 0.64-1.85 |
| Keller 1994 <sup>161</sup>        | CC     | USA                     | 505          | OR              | 1.15 | 0.98-1.34 |
| Kristensen 1996 <sup>162</sup>    | Coh    | Norway                  | 277          | SIR             | 0.96 | 0.85-1.08 |
| Krstev 1998a <sup>163</sup>       | CC     | USA                     | 30           | OR              | 2.17 | 1.18-3.99 |
| Mastrangelo 2005 <sup>164</sup>   | Coh    | Italy                   | 16           | SMR             | 0.69 | 0.39-1.22 |
| Meyer 2003 <sup>165</sup>         | CC     | Brazil                  | 7            | OR              | 0.58 | 0.25-1.35 |
| Meyer 2007 <sup>95</sup>          | CC     | USA                     | 224          | OR              | 1.4  | 1.10-1.78 |
| Morrison 1993 <sup>166</sup>      | Coh    | Canada                  | 1,148        | SMR             | 0.92 | 0.87-0.97 |
| Parker 1999 <sup>167</sup>        | Coh    | USA                     | 30           | RR              | 1.20 | 0.80-1.80 |
| Pukkala 2009 <sup>168</sup>       | Coh    | 5 Nordic countries      | 41,025       | SMR             | 0.99 | 0.98-1.00 |
| Rafnsson 2006 <sup>169</sup>      | Coh    | Island                  | 8,514        | SIR             | 0.92 | 0.85-1.00 |
| Sharma-Wagner 2000 <sup>170</sup> | Coh    | Sweden                  | 7,826        | SIR             | 1.04 | 1.02-1.06 |
| Van der Gulden 1995 <sup>99</sup> | CC     | The Netherlands         | 37           | OR              | 0.85 | 0.57-1.27 |
| Wesseling 1996 <sup>171</sup>     | Coh    | Costa Rica              | 20           | SIR             | 0.61 | 0.37-1.01 |
| Wigle 1990 <sup>172</sup>         | Coh    | Canada                  | 441          | SMR             | 0.96 | 0.87-1.05 |
| Wiklund 199 <sup>173</sup>        | Coh    | Sweden                  | 3,987        | SIR             | 0.93 | 0.90-0.96 |
| Zeegers 2004 <sup>174</sup>       | CC     | The Netherlands         | 61           | RR              | 0.82 | 0.53-1.27 |

CI, confidence interval; Coh, cohort study; CC, case control study; SIR, standardized incidence ratio; OR, odds ratio; SMR, standardized mortality ratio; RR, relative risk.

**Supplementary Table ST2.** Description of studies examining the association between organophosphate pesticides and prostate cancer

| Reference                         | Design | Country   | Exposure                   | No. of cases | Measure of risk | Risk | 95% CI    |
|-----------------------------------|--------|-----------|----------------------------|--------------|-----------------|------|-----------|
| Alavanja 2003 <sup>101</sup>      | Coh    | USA       | Chlorpyrifos               | 12           | OR              | 0.73 | 0.41-1.30 |
| Beane-Freeman 2005 <sup>175</sup> | CC     | USA       | Diazinon                   | 26           | RR              | 1.19 | 0.79-1.79 |
| Christensen 2010 <sup>176</sup>   | Coh    | USA       | Organophosphate pesticides | 30           | RR              | 0.93 | 0.62-1.40 |
| De Roos 2005 <sup>177</sup>       | Coh    | USA       | Glyphosate                 | 825          | RR              | 1.00 | 0.80-1.11 |
| Fritschi 2007 <sup>92</sup>       | CC     | Australia | Organophosphate pesticides | 38           | OR              | 0.69 | 0.43-1.11 |
| Greenburg 2008 <sup>178</sup>     | Coh    | USA       | Captan                     | 34           | RR              | 1.02 | 0.73-1.43 |
| Mills 2003 <sup>111</sup>         | CC     | USA       | Diazinon                   | 117          | OR              | 0.79 | 0.52-1.20 |
|                                   |        |           | Dichlorvos                 | 139          | OR              | 1.35 | 0.93-1.96 |
|                                   |        |           | Malathion                  | 129          | OR              | 0.96 | 0.66-1.40 |

CI, confidence interval; Coh, cohort study; CC, case control study; OR, odds ratio; RR, relative risk.

**Supplementary Table ST3.** Description of studies examining the association between carbamates and prostate cancer

| Reference                      | Design | Country | Exposure   | No. of cases | Measure of risk | Risk | 95% CI    |
|--------------------------------|--------|---------|------------|--------------|-----------------|------|-----------|
| Bonner 2005 <sup>179</sup>     | Coh    | USA     | Carbofuran | 17           | RR              | 0.88 | 0.53-1.46 |
| Lynch 2009 <sup>180</sup>      | Coh    | USA     | Butylat    | 39           | RR              | 1.44 | 1.04-1.99 |
| Mahajan 2007 <sup>181</sup>    | Coh    | USA     | Carbaryl   | 29           | RR              | 0.71 | 0.46-1.10 |
| Mills 2003 <sup>111</sup>      | CC     | USA     | Mancozeb   | 126          | OR              | 0.93 | 0.63-1.37 |
|                                |        |         | Maneb      | 116          | OR              | 1.00 | 0.68-1.47 |
|                                |        |         | Propoxur   | 132          | OR              | 1.07 | 0.70-1.64 |
| Van Bommel 2008 <sup>182</sup> | Coh    | USA     | EPTC       | 61           | RR              | 1.17 | 0.89-1.54 |

CI, confidence interval; Coh, cohort study; CC, case control study; RR, relative risk; OR, odds ratio.

**Supplementary Table ST4.** Description of studies examining the association between triazines and prostate cancer

| <b>Reference</b>               | <b>Design</b> | <b>Country</b> | <b>Exposure</b> | <b>No. of cases</b> | <b>Measure of risk</b> | <b>Risk</b> | <b>95% CI</b> |
|--------------------------------|---------------|----------------|-----------------|---------------------|------------------------|-------------|---------------|
| Hessel 2004 <sup>183</sup>     | CC            | USA            | Atrazine        | 12                  | RR                     | 1.01        | 0.95-1.07     |
| Koutros 2013 <sup>108</sup>    | Coh           | USA            | Atrazine        | 135                 | RR                     | 0.98        | 0.85-1.13     |
|                                |               |                | Cyanazine       | 168                 | RR                     | 0.94        | 0.79-1.12     |
| Mac Lennan 2002 <sup>184</sup> | Coh           | USA            | Chlorotriazine  | 11                  | SIR                    | 1.75        | 0.87-3.52     |
| Mills 2003 <sup>111</sup>      | CC            | USA            | Simazine        | 145                 | OR                     | 1.53        | 1.02-2.30     |

CI, confidence interval; Coh, cohort study; CC, case control study; RR, relative risk; SIR, standardized incidence ratio OR, odds ratio.

**Supplementary Table ST5.** Description of studies examining the association between cadmium and prostate cancer

| Reference                         | Design | Country         | Exposure               | No. of cases | Measure of risk | Risk | 95% CI    |
|-----------------------------------|--------|-----------------|------------------------|--------------|-----------------|------|-----------|
| Armstrong 1985 <sup>185</sup>     | CC     | Great Britain   | JEM                    | 11           | OR              | 1.55 | 0.49-4.90 |
| Elghany 1990 <sup>186</sup>       | CC     | Australia       | self-reported exposure | 12           | OR              | 1.30 | 0.60-2.82 |
| Järup 1998 <sup>187</sup>         | Coh    | Sweden          | battery work           | 15           | SIR             | 0.77 | 0.43-1.38 |
| Rooney 1993 <sup>188</sup>        | CC     | Great Britain   | expert assessment      | 12           | RR              | 1.06 | 0.46-2.44 |
| Seidler 1998 <sup>189</sup>       | CC     | Germany         | JEM                    | 5            | OR              | 0.7  | 0.20-2.20 |
| Sorahan 2004 <sup>190</sup>       | Coh    | Great Britain   | battery work           | 9            | SMR             | 1.16 | 0.53-2.54 |
| Van der Gulden 1995 <sup>99</sup> | CC     | The Netherlands | self-reported exposure | 7            | OR              | 2.76 | 1.05-7.25 |

CI, confidence interval; CC, case control study; Coh, cohort study; OR, odds ratio; SIR, standardized incidence ratio; RR, relative risk; SMR, standardized mortality ratio.

**Supplementary Table ST6.** Description of studies examining the association between cutting fluids and prostate cancer

| References                       | Design | Country         | Exposure                       | No. of cases | Risk measures | Risk | 95% CI    |
|----------------------------------|--------|-----------------|--------------------------------|--------------|---------------|------|-----------|
| Boers 2005 <sup>85</sup>         | Coh    | The Netherlands | Mineral oils                   | 44           | RR            | 0.99 | 0.67-1.46 |
| Decoufle 1978 <sup>191</sup>     | Coh    | USA             | Cutting oil mists              | 6            | SMR           | 0.57 | 0.23-1.41 |
| Fritschi 2007 <sup>92</sup>      | CC     | Australia       | Mineral oils                   | 61           | OR            | 0.89 | 0.59-1.34 |
| Järholm 1987 <sup>192</sup>      | Coh    | Sweden          | Oil mist                       | 6            | SIR           | 0.34 | 0.10-0.16 |
| Krishnadasan 2007 <sup>193</sup> | CC     | USA             | Mineral oils                   | 66           | OR            | 0.72 | 0.38-1.36 |
| Ritz 1999 <sup>194</sup>         | Coh    | USA             | Cutting fluid                  | 6            | RR            | 0.58 | 0.22-1.53 |
| Seidler 1998 <sup>189</sup>      | CC     | Germany         | Cutting fluid                  | 34           | OR            | 1.10 | 0.60-1.48 |
| Tolbert 1992 <sup>195</sup>      | Coh    | USA             | Mineral oils                   | 72           | SMR           | 1.16 | 0.91-1.46 |
|                                  |        |                 | Cutting fluid and soluble oils | 125          | SMR           | 1.08 | 0.90-1.30 |
|                                  |        |                 | Synthetic fluids               | 26           | SMR           | 1.11 | 0.73-1.69 |

CI, confidence interval; Coh, cohort study; CC, case control study; RR, relative risk; SMR, standardized mortality ratio; OR, odds ratio; SIR, standardized incidence ratio.

**Supplementary Table ST7.** Description of studies that examined the association between acrylonitrile and prostate cancer

| <b>Reference</b>           | <b>Design</b> | <b>Country</b>  | <b>Exposure</b>                       | <b>No. of cases</b> | <b>Risk measures</b> | <b>Risk</b> | <b>95% CI</b> |
|----------------------------|---------------|-----------------|---------------------------------------|---------------------|----------------------|-------------|---------------|
| Blair 1998 <sup>196</sup>  | Coh           | USA             | Acrylonitrile production              | 16                  | SMR                  | 0.90        | 0.60-1.35     |
| Marsh 2015 <sup>197</sup>  | Coh           | USA             | Chemical plant                        | 5                   | SMR                  | 1.32        | 0.43-4.05     |
| Swaen 2004 <sup>198</sup>  | Coh           | The Netherlands | Manufacture of acrylonitrile products | 8                   | SMR                  | 0.92        | 0.40-2.12     |
| Symons 2008 <sup>199</sup> | Coh           | USA             | Acrylonitrile fiber production        | 25                  | SMR                  | 0.91        | 0.59-1.40     |

CI, confidence interval; Coh, cohort study; SMR, standardized mortality ratio.

**Supplementary Table ST8.** Description of studies examining the association between exposure in rubber manufacturing and prostate cancer

| Reference                               | Design | Country         | Exposure             | No. of cases | Measure of risk | Risk | 95% CI     |
|-----------------------------------------|--------|-----------------|----------------------|--------------|-----------------|------|------------|
| Andjelkovic 1976 <sup>200</sup>         | Coh    | USA             | Rubber industry      | 50           | SMR             | 1.09 | 0.82-1.45  |
| Delzell 1981a <sup>201</sup>            | Coh    | USA             | Rubber industry      | 121          | SMR             | 1.02 | 0.85-1.22  |
| Delzell 1981b <sup>202</sup>            | Coh    | USA             | Rubber tire industry | 9            | SMR             | 0.88 | 0.43-1.80  |
| Delzell 2006 <sup>203</sup>             | Coh    | USA             | Rubber industry      | 154          | SMR             | 1.04 | 0.88-1.23  |
| De Vocht 2009 <sup>204</sup>            | Coh    | Poland          | Aromatic amines      | NR           | RR              | 5.22 | 0.88-30.96 |
|                                         |        |                 | Inhalable aerosol    | NR           | RR              | 0.71 | 0.12-4.20  |
| Gustavsson 1986 <sup>205</sup>          | Coh    | Sweden          | Rubber industry      | 34           | SIR             | 0.82 | 0.57-1.18  |
| McMichael 1974 <sup>206</sup>           | Coh    | USA             | Rubber industry      | 49           | SIR             | 1.42 | 1.07-1.88  |
| McMichael 1976 <sup>207</sup>           | Coh    | USA             | Rubber industry      | 103          | SMR             | 1.19 | 0.98-1.45  |
| Monson 1978 <sup>208</sup>              | Coh    | USA             | Rubber workers       | 82           | SMR             | 0.92 | 0.74-1.14  |
| Norseth 1983 <sup>209</sup>             | Coh    | Norway          | Footwear and tire    | 23           | SMR             | 1.10 | 0.72-1.68  |
| Sorahan 1989 <sup>210</sup>             | Coh    | Great Britain   | Rubber workers       | 91           | SMR             | 0.71 | 0.57-0.92  |
| Szeszenia-Dabrowska 1991 <sup>211</sup> | Coh    | Poland          | Rubber industry      | 9            | SMR             | 0.94 | 0.46-1.92  |
| Wingren 2007 <sup>212</sup>             | Coh    | Sweden          | Rubber tires         | 84           | SIR             | 0.74 | 0.59-0.93  |
| Vlaanderen 2013 <sup>213</sup>          | Coh    | Germany         | Rubber industry      | 108          | SMR             | 0.89 | 0.73-1.09  |
| Zeegers 2004 <sup>174</sup>             | CC     | The Netherlands | Rubber workers       | 6            | RR              | 4.63 | 0.28-76.6  |

CI, confidence interval; Coh, cohort study; CC, case control study; NR, not reported; SMR, standardized mortality ratio; RR, relative risk; SIR, standardized incidence ratio.



**Supplementary Table ST9.** Description of studies examining the association between whole-body vibration and prostate cancer

| References                        | Design | Country         | Exposure                             | No. of cases | Measure of risk | Risk | 95% CI     |
|-----------------------------------|--------|-----------------|--------------------------------------|--------------|-----------------|------|------------|
| Brown 2000 <sup>214</sup>         | CC     | USA             | Motor vehicle drivers, railroad work | 26           | OR              | 1.90 | 1.20-3.20  |
| Jones 2014 <sup>254</sup>         | Coh    | Canada          | General population, JEM              | 1,919        | HR              | 0.96 | 0.91-1.00  |
| Järholm 2003 <sup>216</sup>       | Coh    | Sweden          | Truck drivers                        | 124          | SIR             | 1.24 | 1.03-1.48  |
|                                   |        |                 | Heavy construction vehicle           | 116          | SIR             | 0.93 | 0.77-1.11  |
| Krstev 1998b <sup>217</sup>       | CC     | USA             | Railroad transportation              | 65           | OR              | 1.66 | 1.13-2.58  |
|                                   |        |                 | Trucking, short and long distance    | 52           | OR              | 0.87 | 0.61-1.26  |
|                                   |        |                 | Excavation, grading                  | 8            | OR              | 3.96 | 1.03-15.10 |
| Krstev 1998a <sup>163</sup>       | CC     | USA             | Bus drivers                          | 47           | OR              | 1.40 | 1.00-1.80  |
|                                   |        |                 | Locomotive drivers                   | 8            | OR              | 2.20 | 1.10-4.40  |
|                                   |        |                 | Truck drivers, heavy                 | 1,138        | OR              | 0.8  | 0.80-0.90  |
| Nadalin 2012 <sup>218</sup>       | CC     | Canada          | JEM                                  | NR           | OR              | 1.04 | 0.76-1.43  |
| Pukkala 2009 <sup>168</sup>       | Coh    | Scandinavia     | Transportation workers               | 399          | SIR             | 1.02 | 0.99-1.04  |
|                                   |        |                 | Drivers                              | 993          | SIR             | 0.99 | 0.98-1.01  |
| Sass-Kortsak 2007 <sup>147</sup>  | CC     | Canada          | Expert assessment                    | 112          | OR              | 1.38 | 1.06-1.78  |
| Sharma-Wagner 2000 <sup>170</sup> | Coh    | Sweden          | Railroad traffic                     | 517          | SIR             | 1.12 | 1.02-1.22  |
| Zeegers 2004 <sup>174</sup>       | Coh    | The Netherlands | Road transport                       | 700          | RR              | 0.82 | 0.36-1.84  |

CI, confidence interval; CC, case control study; Coh, cohort study; JEM, job exposure matrix; OR, odds ratio; HR, hazard ratio; SIR, standardized incidence ratio; RR, relative risk.

**Supplementary Table ST10.** Description of studies that examined the association between ionizing radiation and prostate cancer

| Reference                     | Design | Country       | Exposure                       | No. of cases | Measure of risk | Risk | 95% CI    |
|-------------------------------|--------|---------------|--------------------------------|--------------|-----------------|------|-----------|
| Atkinson 2004 <sup>219</sup>  | Coh    | Great Britain | Nuclear research               | 200          | SMR             | 0.92 | 0.80-1.06 |
| Boice 2006a <sup>220</sup>    | Coh    | USA           | Nuclear technology development | 37           | SMR             | 0.93 | 0.66-1.31 |
| Cardis 2007 <sup>221</sup>    | Coh    | 15 countries  | Nuclear plant                  | 301          | SMR             | 1.00 | 0.89-1.12 |
| Checkoway 1985 <sup>222</sup> | Coh    | USA           | Nuclear research laboratory    | 14           | SMR             | 1.16 | 0.66-2.04 |
| Gun 2008 <sup>223</sup>       | Coh    | Australia     | Nuclear tests                  | 548          | SIR             | 1.22 | 1.12-1.33 |
| Loomis 1996 <sup>224</sup>    | Coh    | USA           | Nuclear material production    | 36           | SMR             | 1.31 | 0.91-1.89 |
| Muirhead 2003 <sup>225</sup>  | Coh    | Great Britain | Nuclear tests                  | 244          | RR              | 1.22 | 1.04-1.43 |
| Samson 2011 <sup>226</sup>    | Coh    | France        | Nuclear plant                  | 22           | SMR             | 0.87 | 0.59-1.28 |
| Sigurdson 2003 <sup>227</sup> | Coh    | USA           | Radiologic technicians         | 222          | SIR             | 1.02 | 0.89-1.17 |

CI, confidence interval; Coh, cohort study; SMR, standardized mortality ratio; SIR, standardized incidence ratio; RR, relative risk.

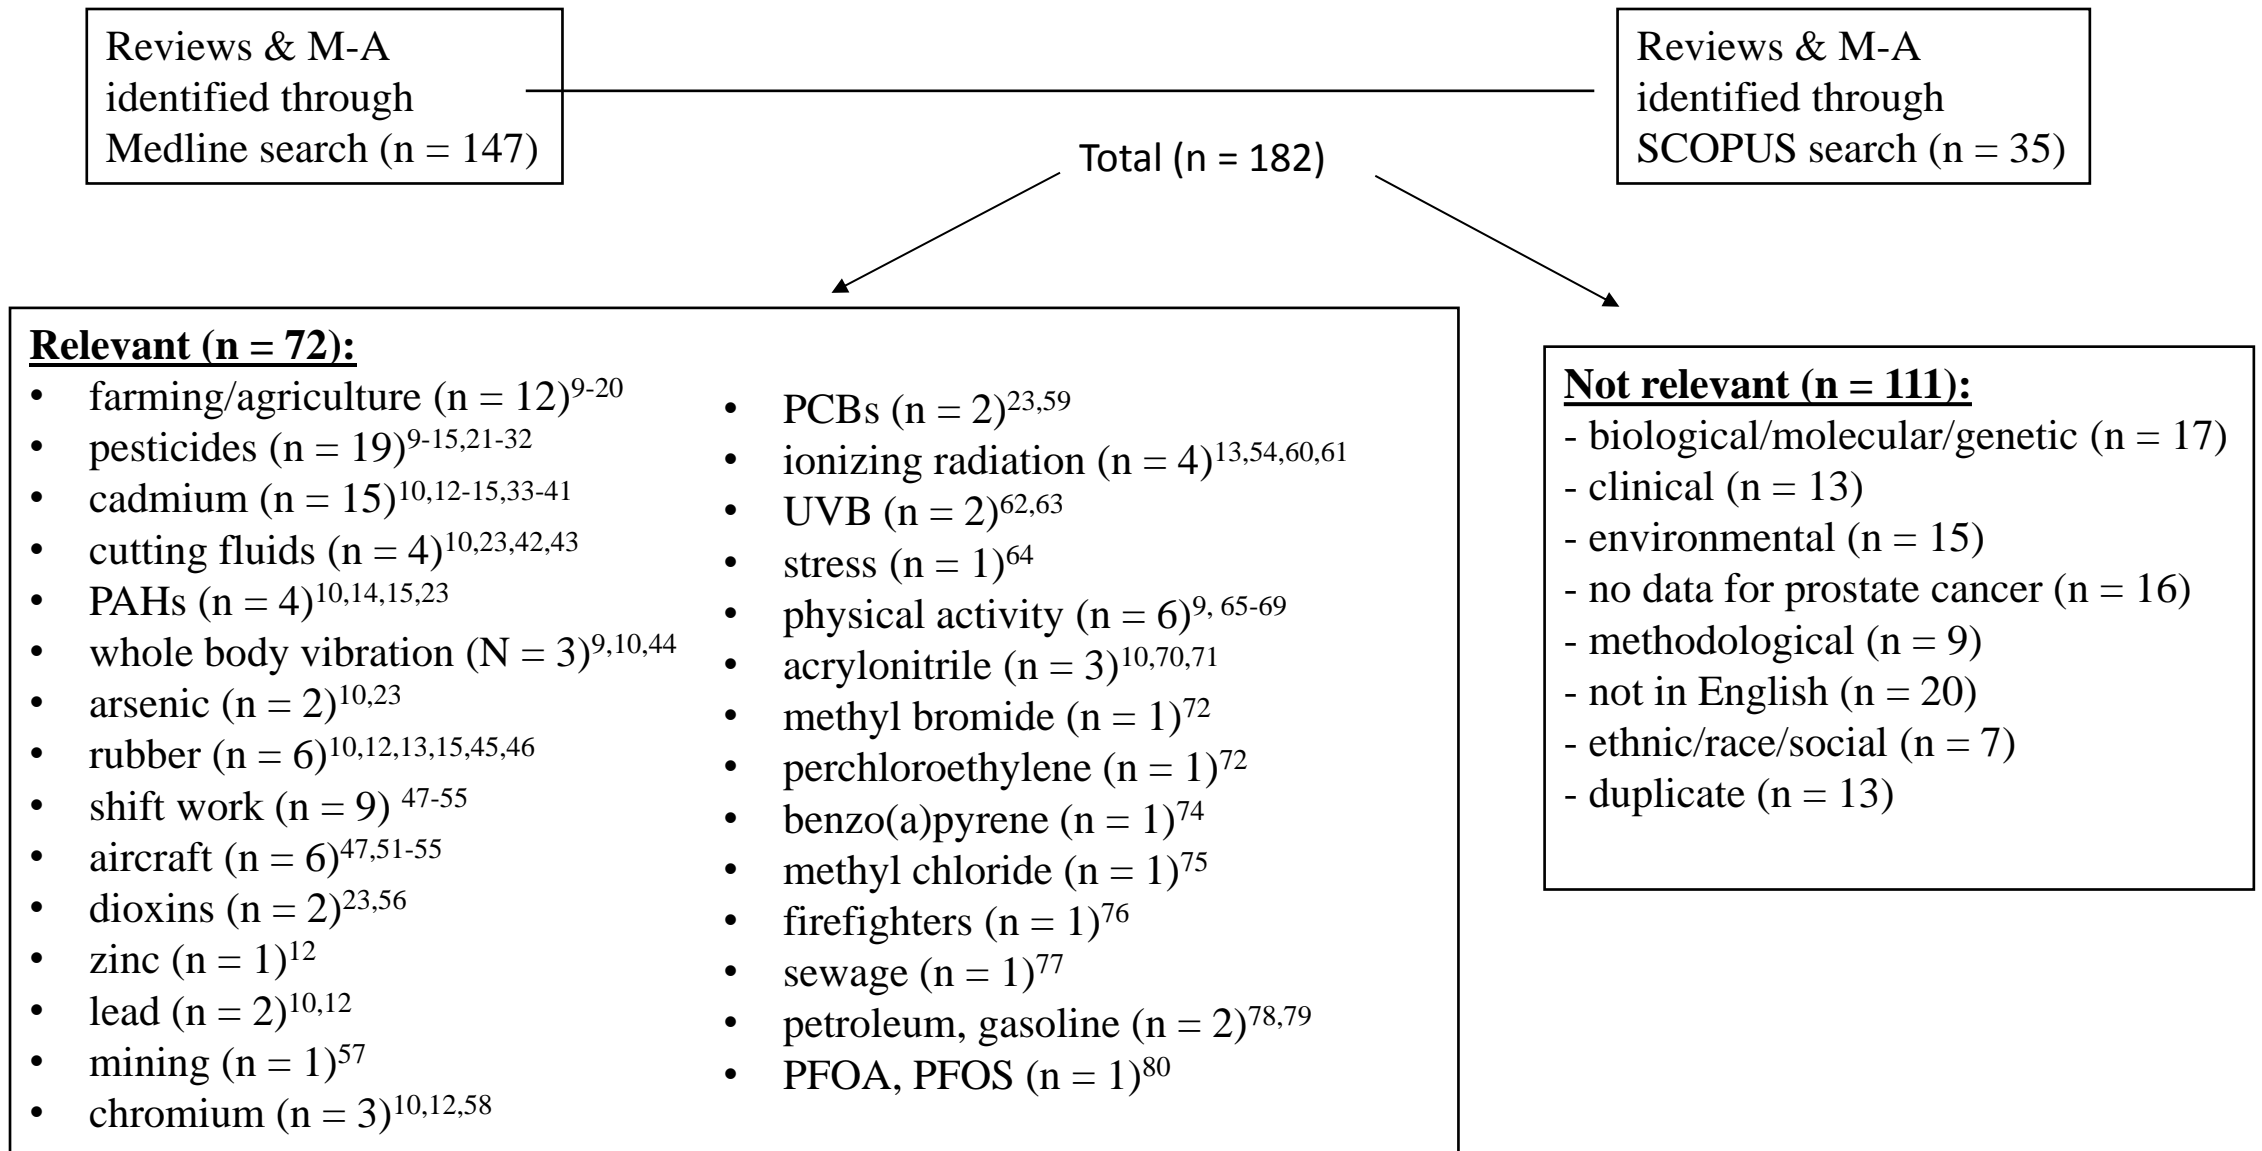

Supplementary Figure SF1. Flowchart of selected articles through the Medline and SCOPUS search for prostate cancer and occupational risk factors 1964 to June 2015.

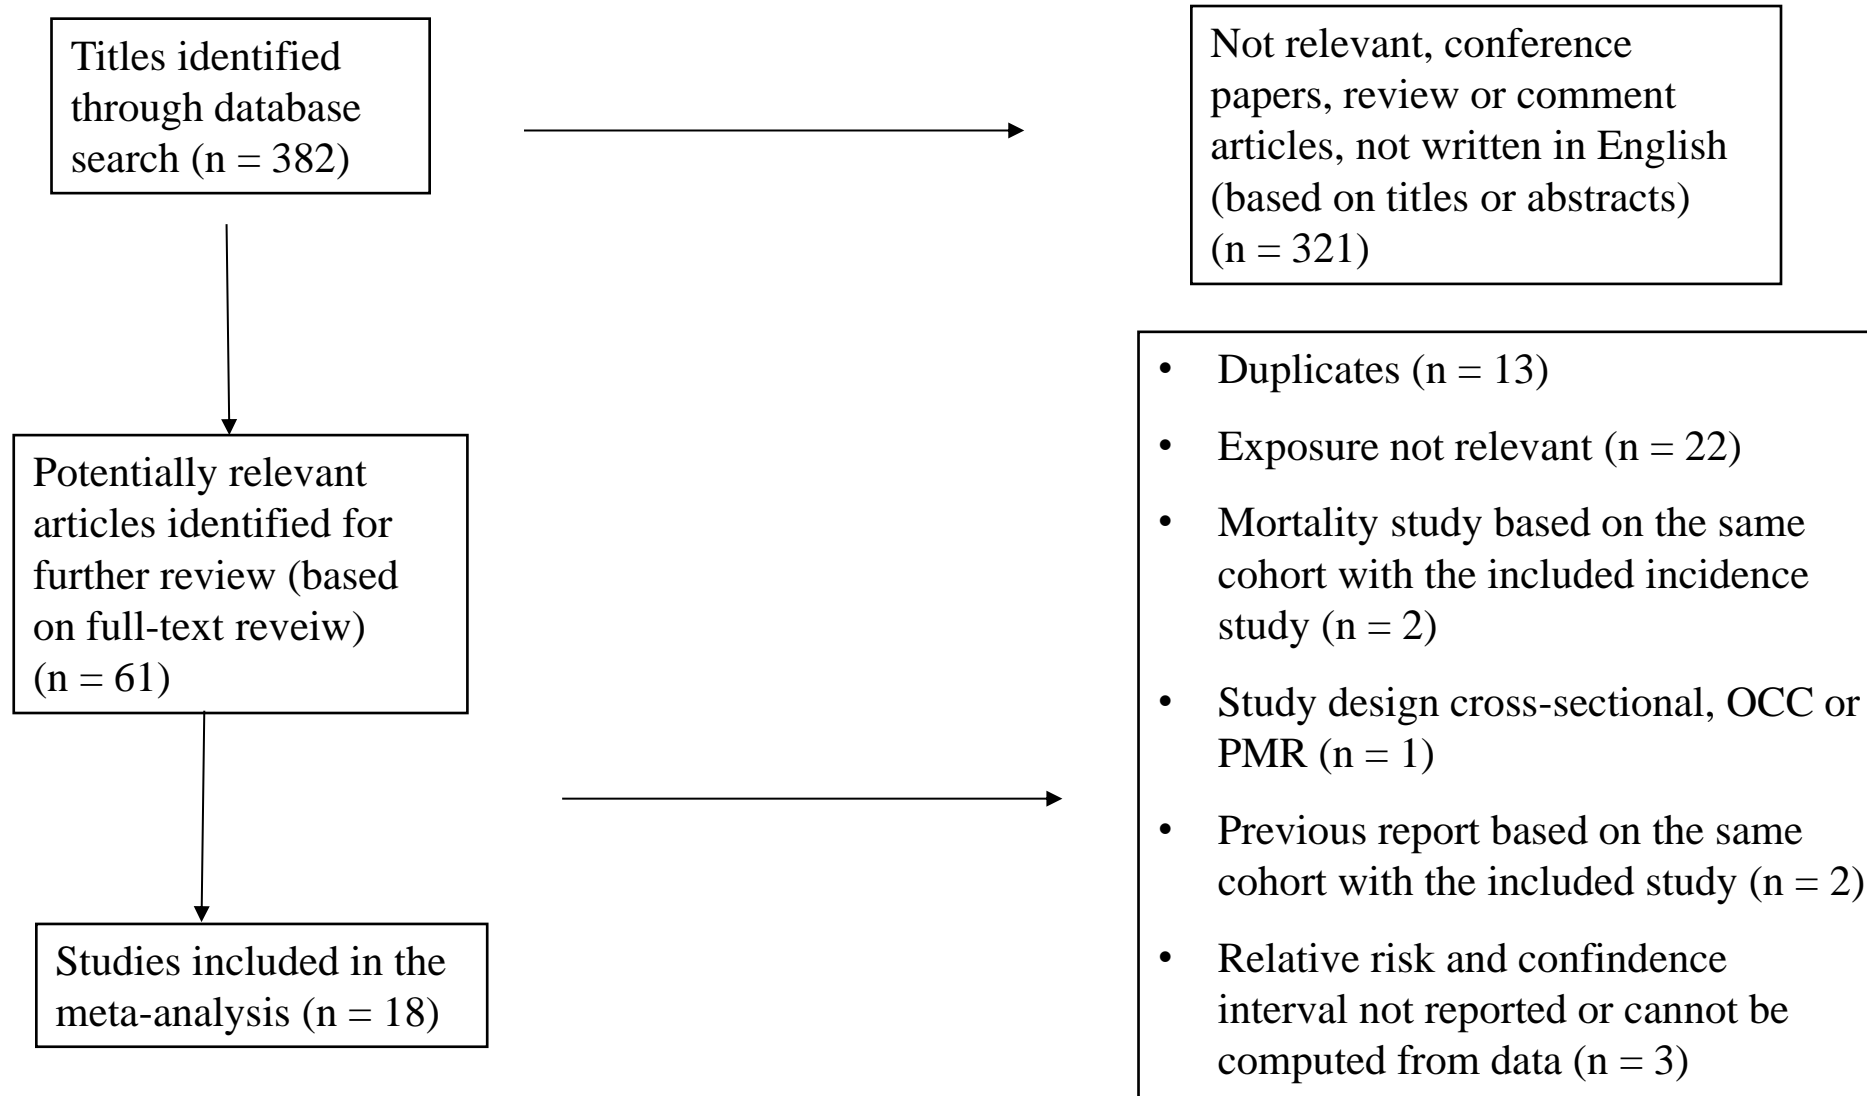

Supplementary Figure SF2. Flowchart for literature search of association between exposure to pesticides and prostate cancer.

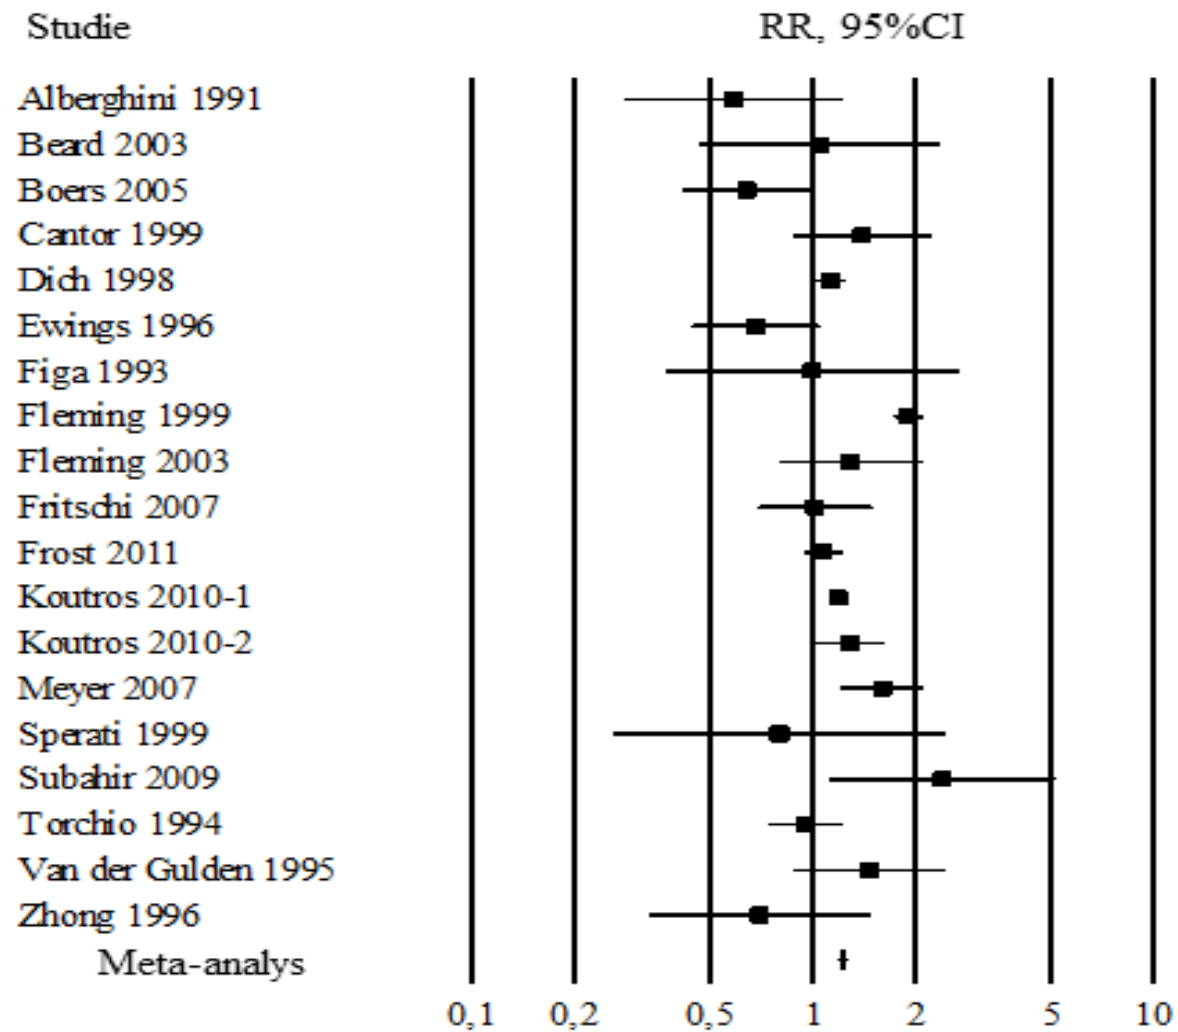

Supplementary Figure SF3. Results of meta-analysis of association between exposure to pesticides and prostate cancer.

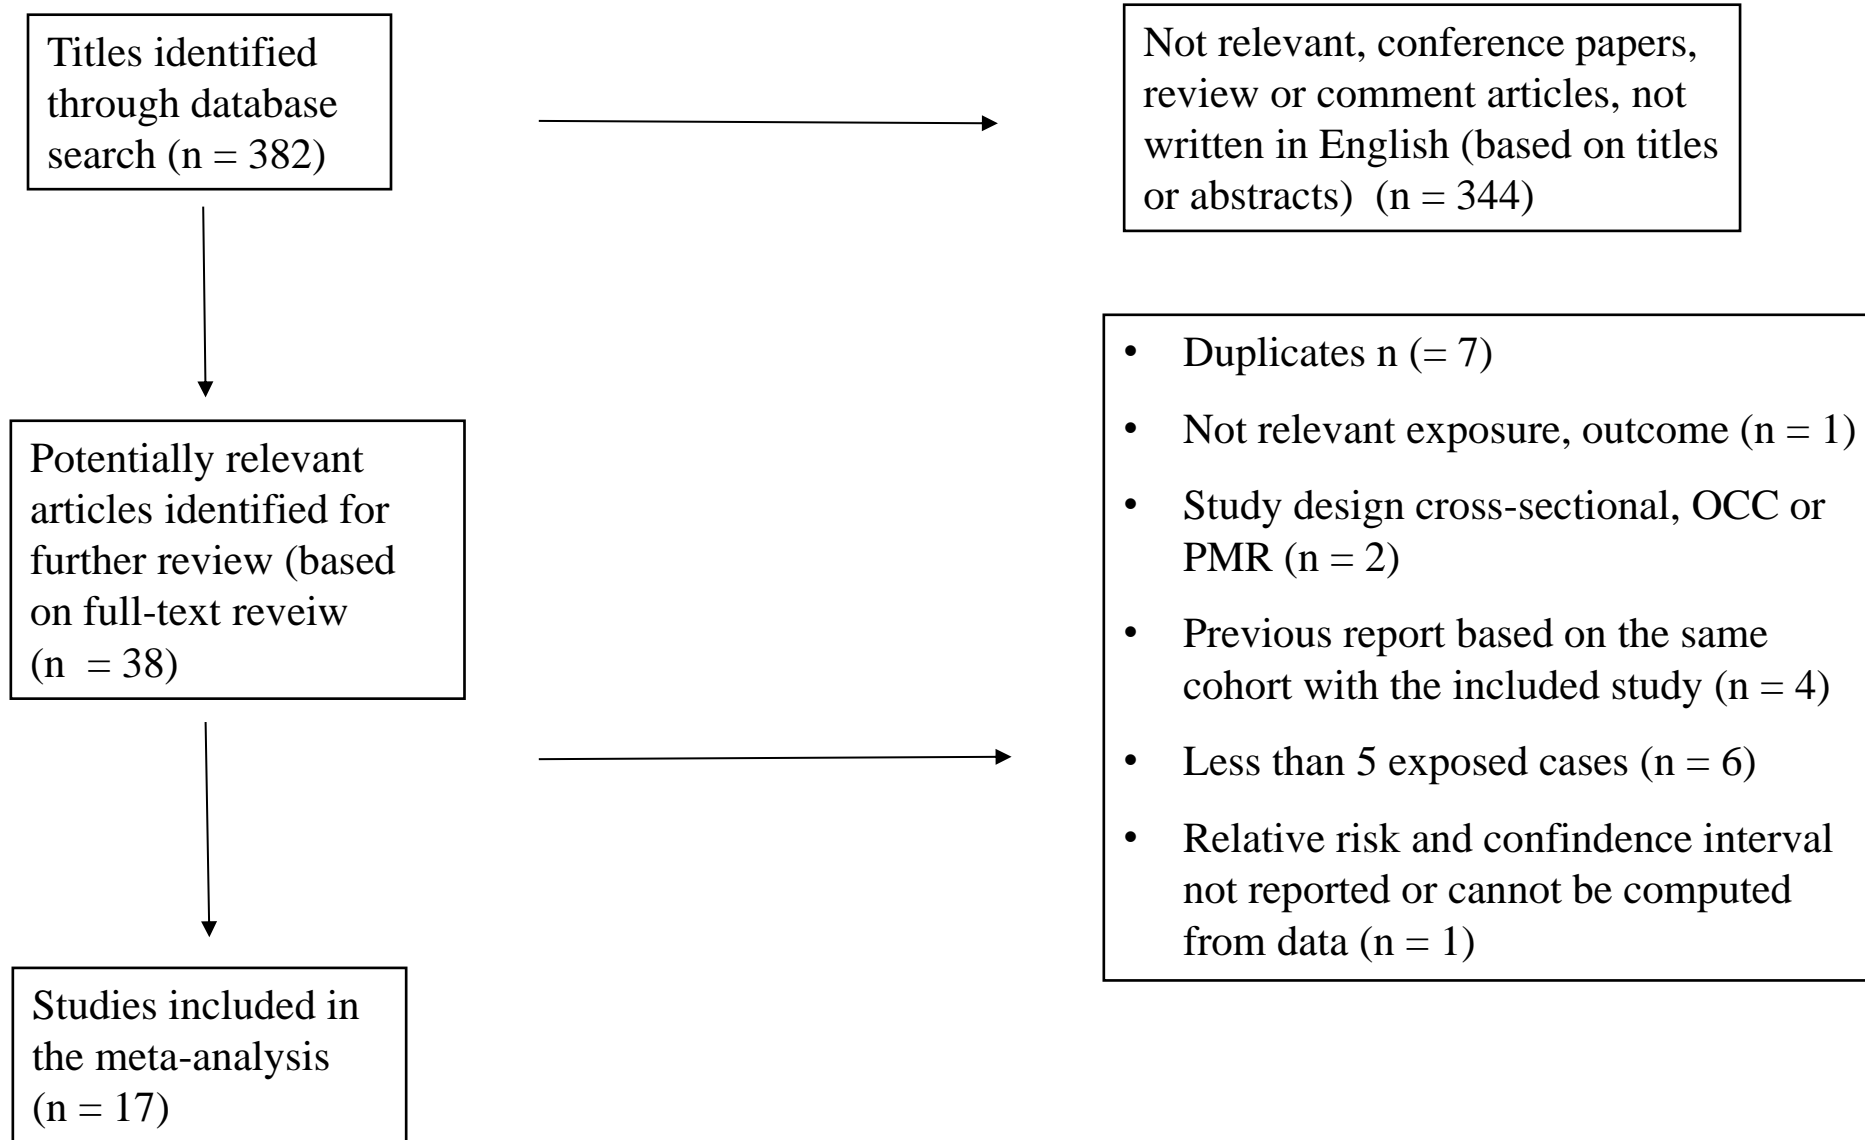

Supplementary Figure SF4. Flowchart for literature search of association between exposure to organochlorine pesticides and prostate cancer.

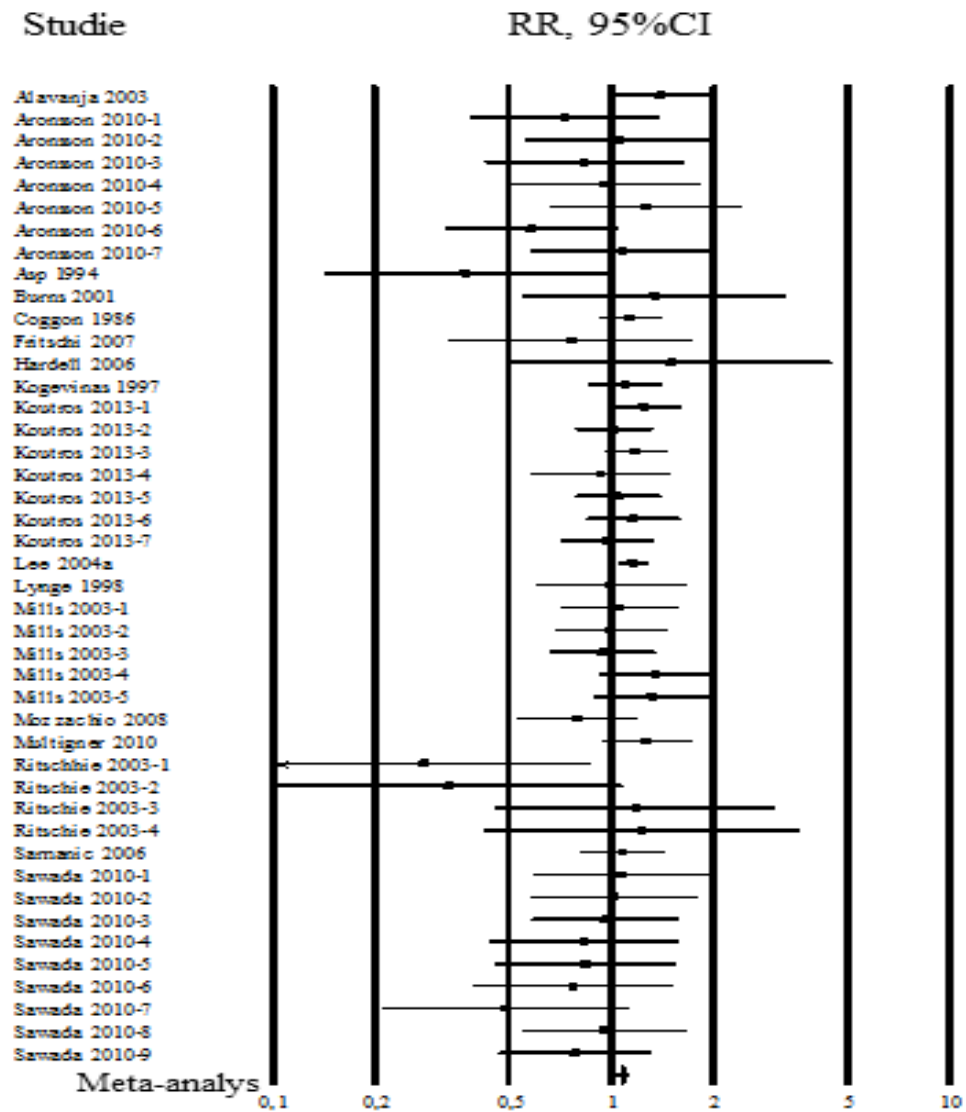

Supplementary Figure SF5. Results of the meta-analysis of the association between organochlorine pesticides and prostate cancer.

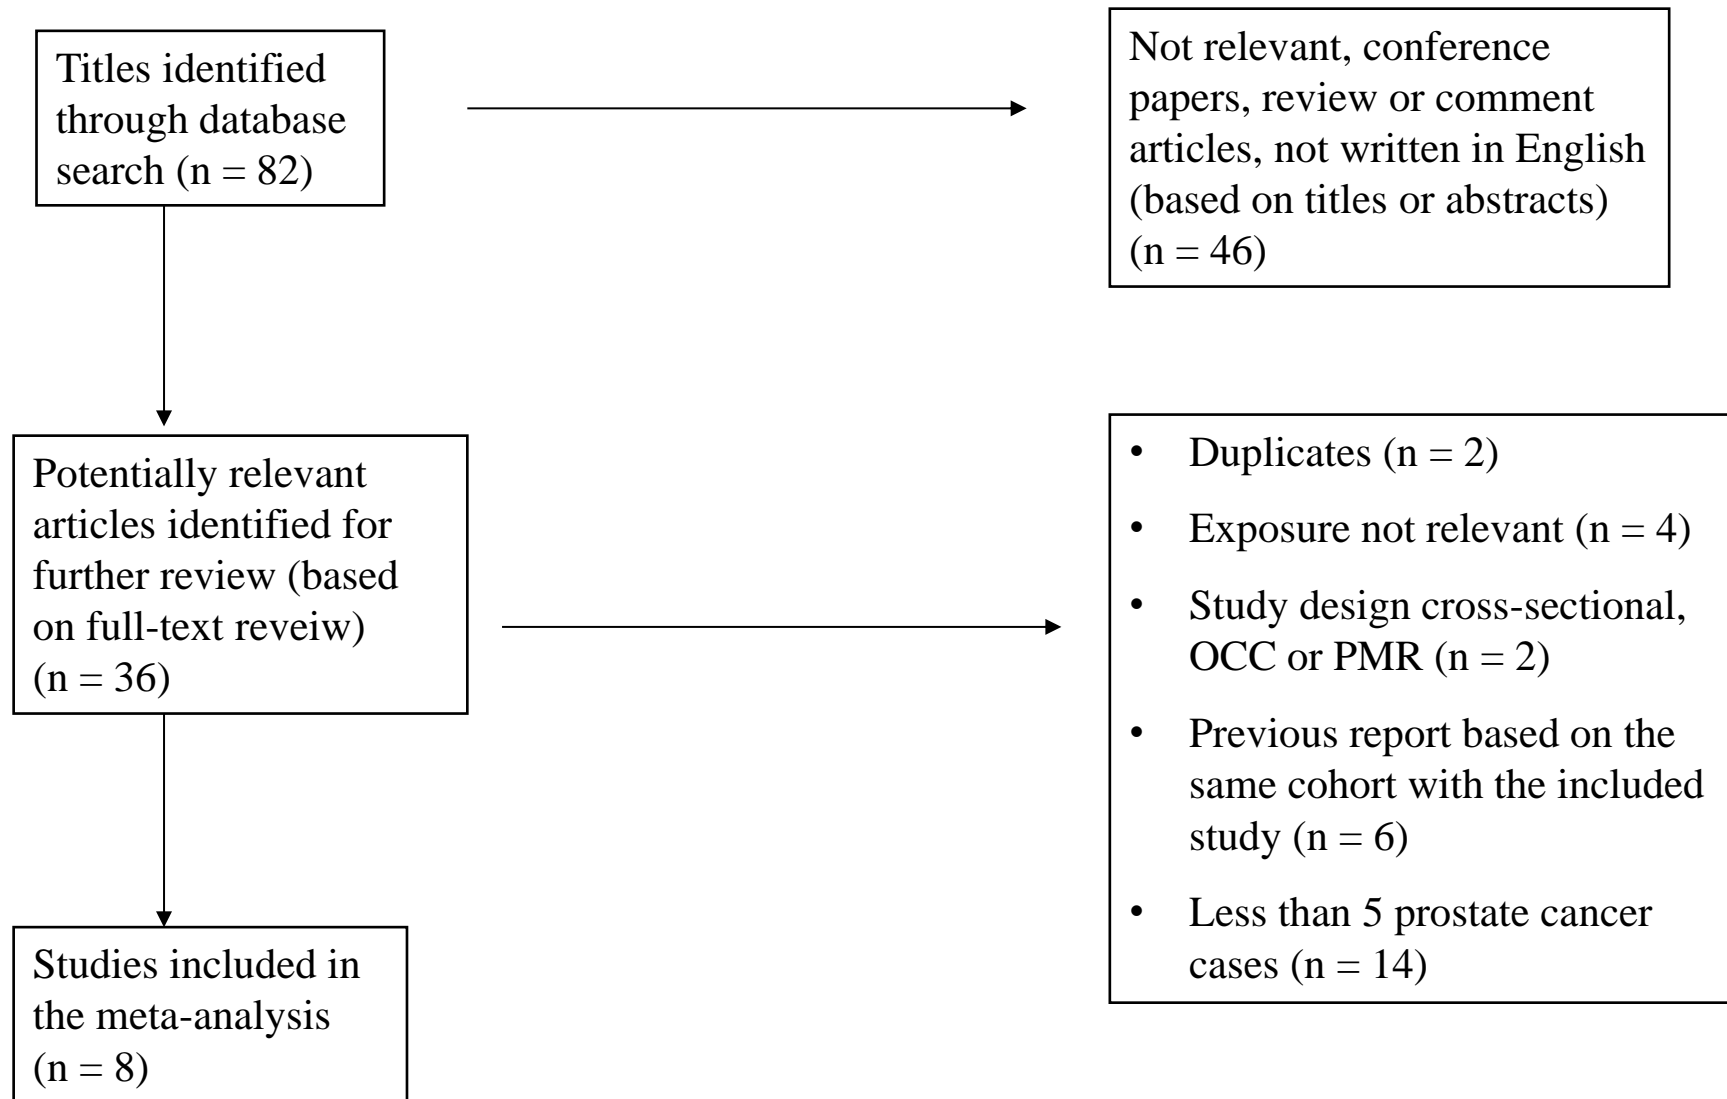

Supplementary Figure SF6. Flowchart for literature search of association between exposure to chromium and prostate cancer.



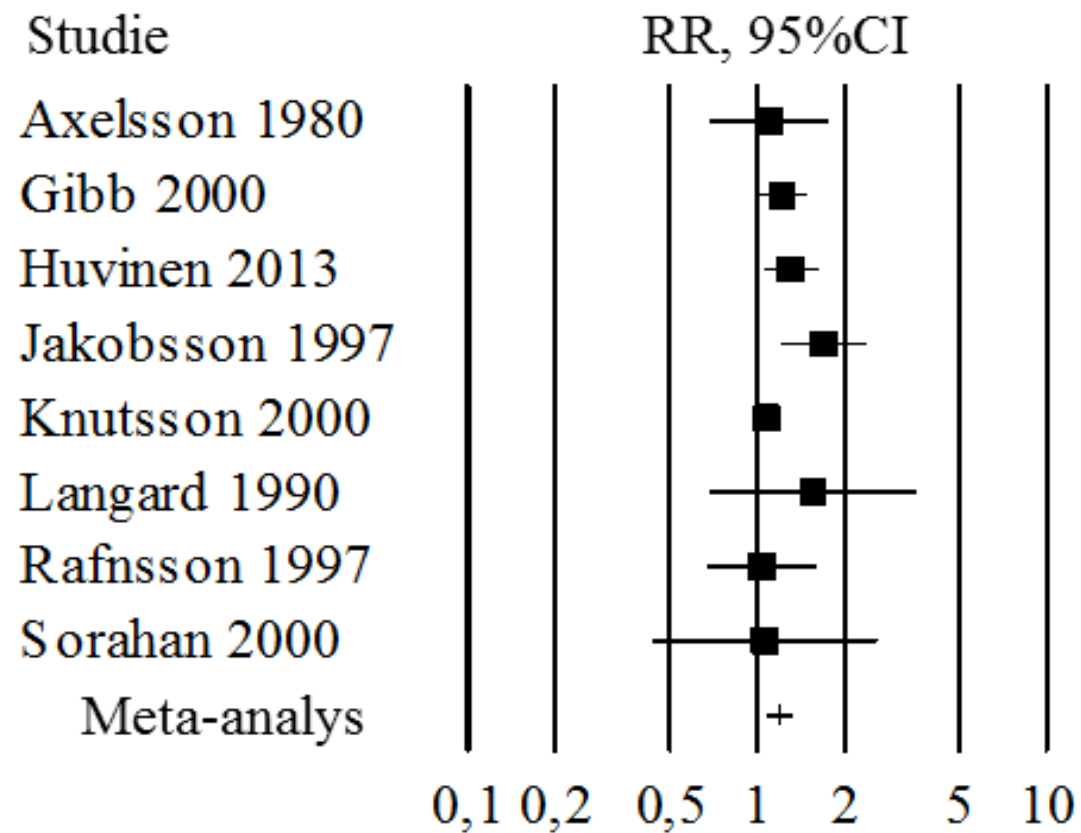

Supplementary Figure SF7. Results of the meta-analysis of the association between chromium and prostate cancer.

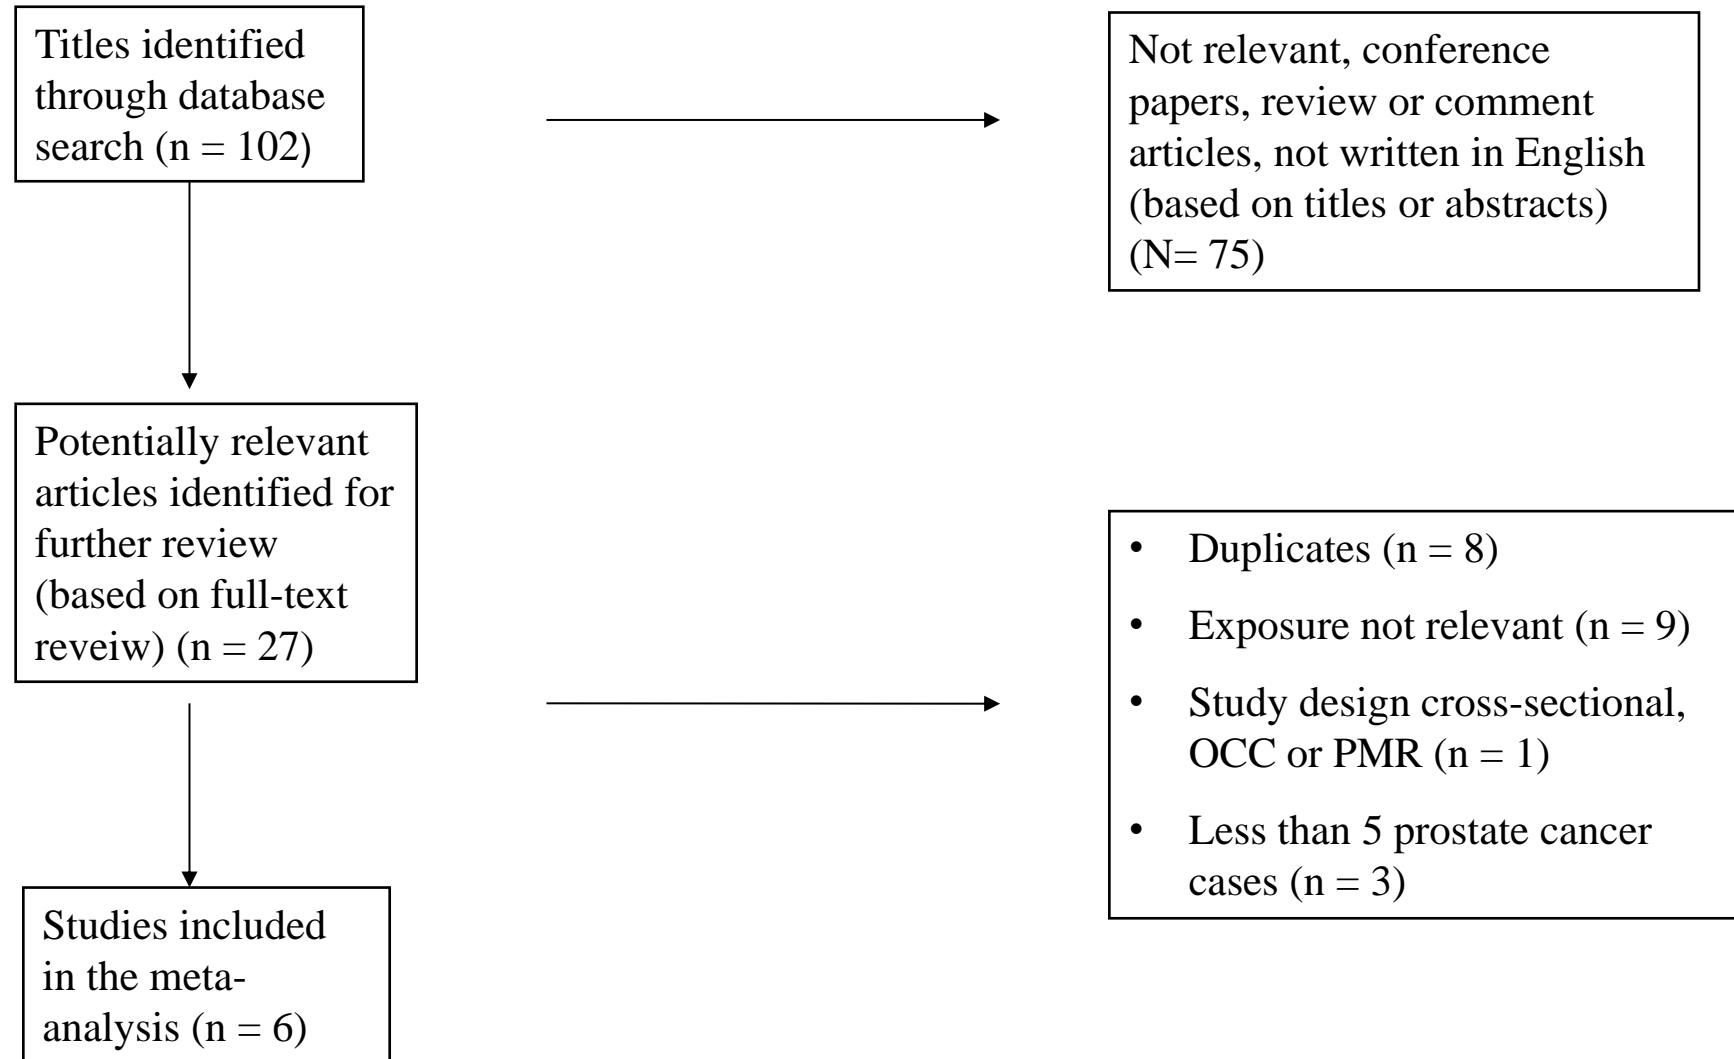

Supplementary Figure SF8. Flowchart for literature search of association between exposure to shift work and prostate cancer.

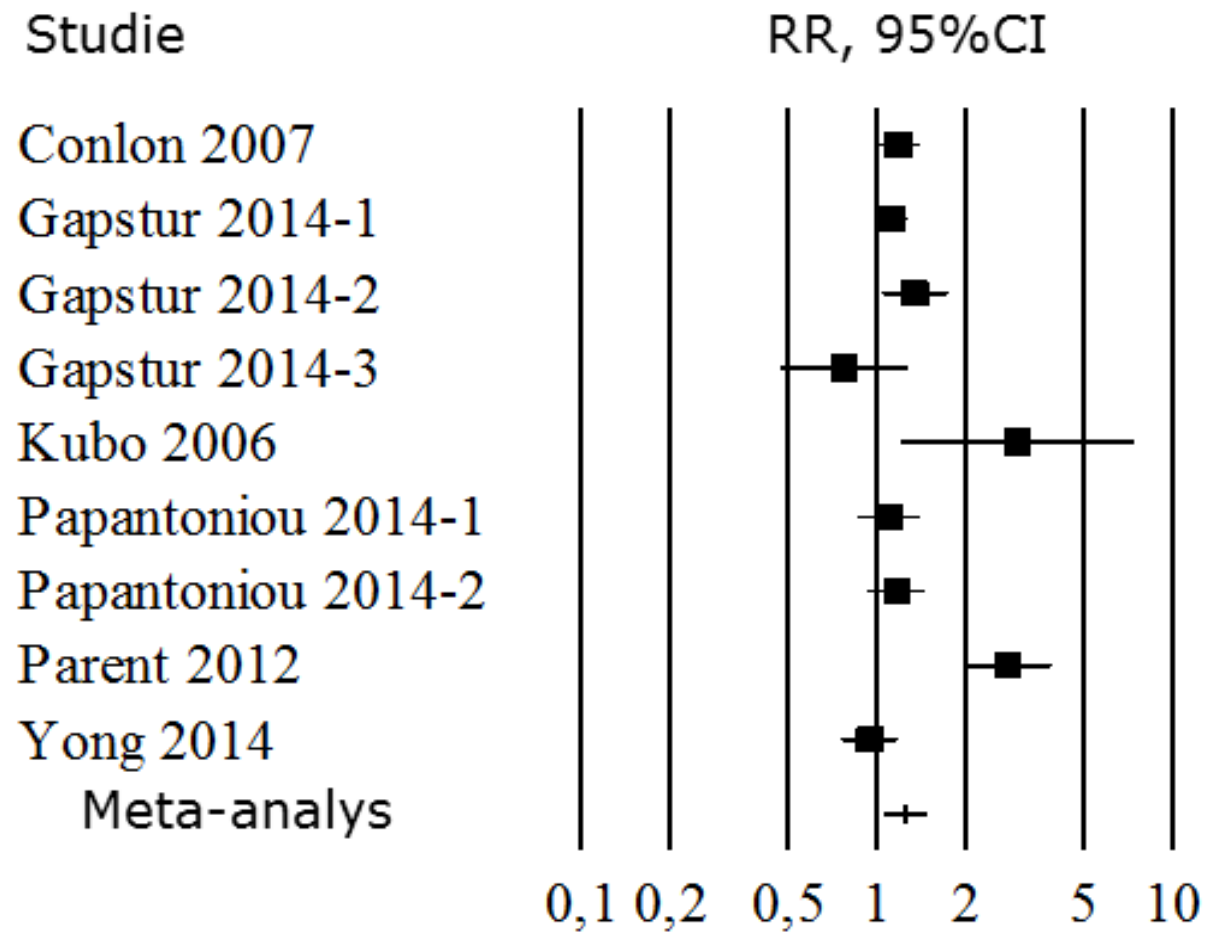

Supplementary Figure SF9. Results of the meta-analysis of the association between shift work and prostate cancer.

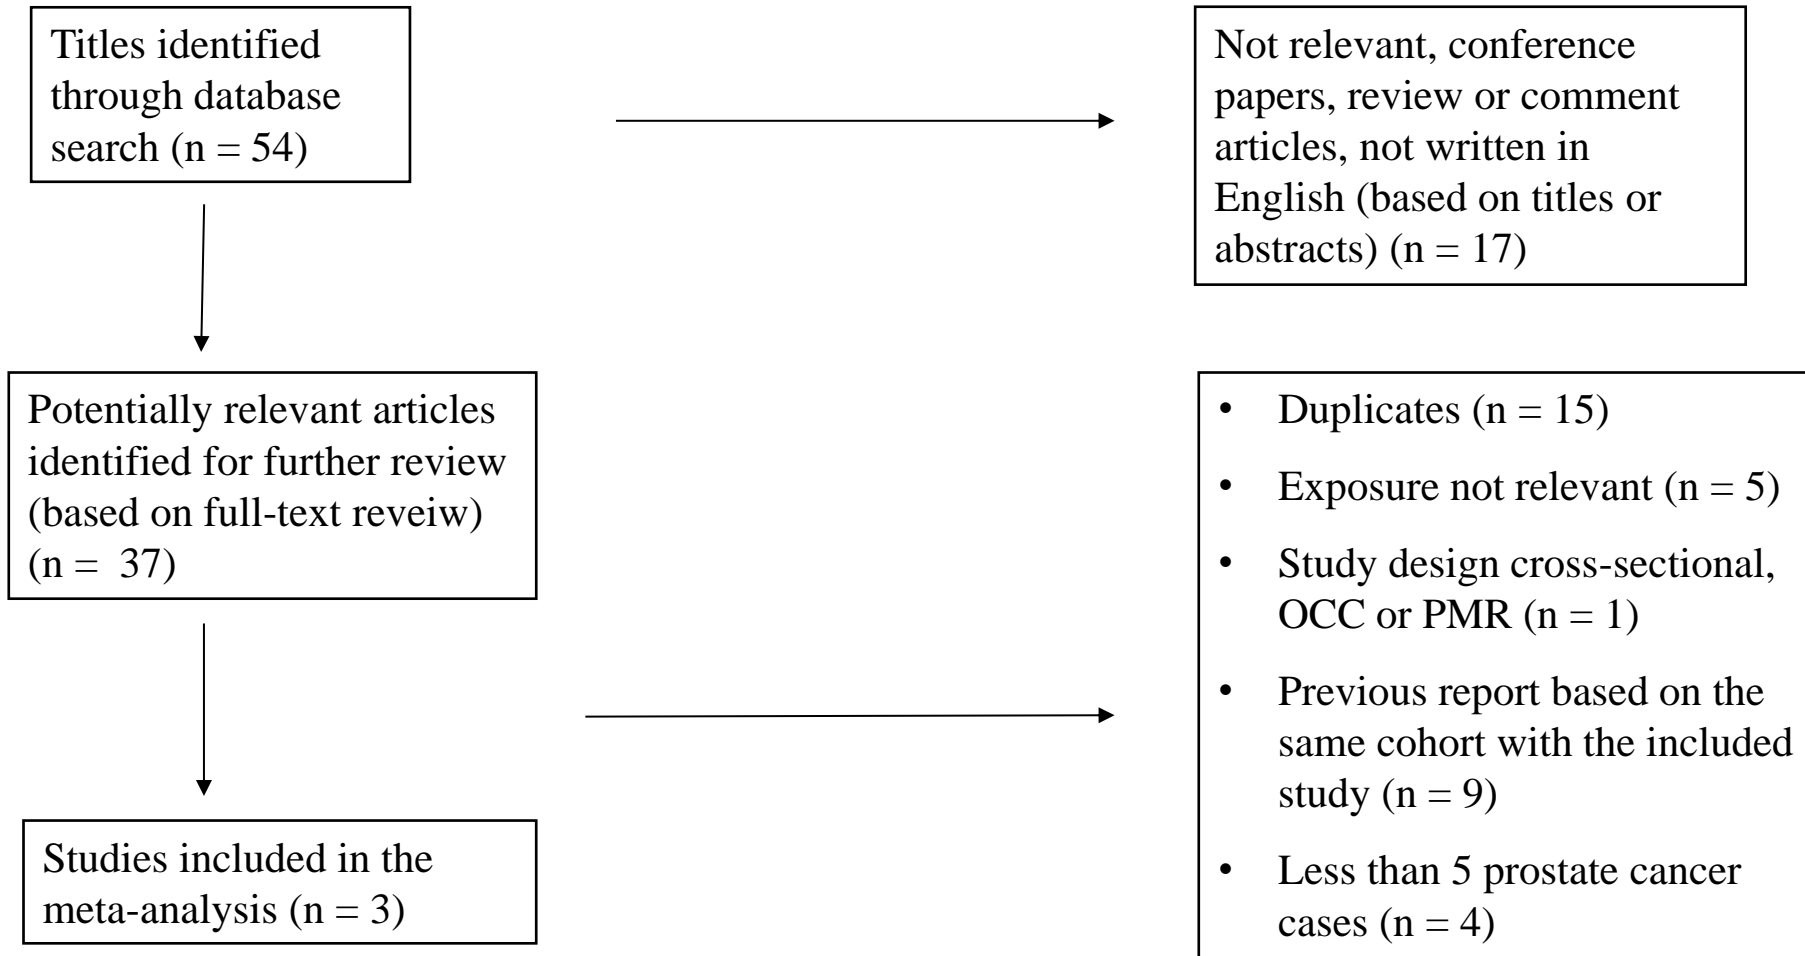

Supplementary Figure SF10. Flowchart for literature search of association between exposure to flight personnel and prostate cancer.

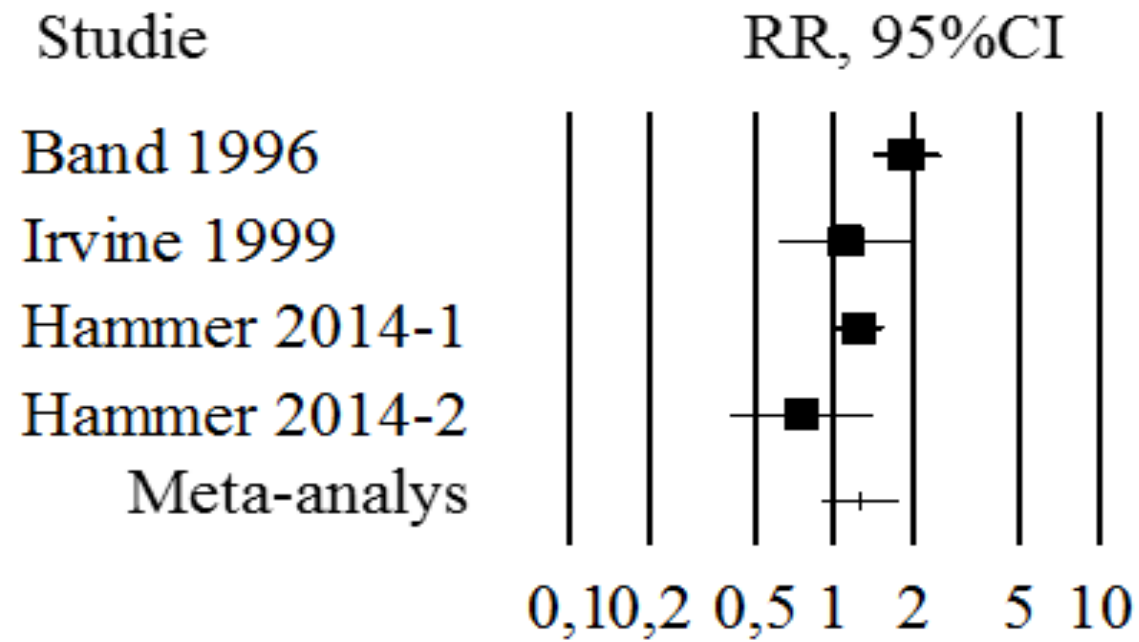

Supplementary Figure SF11. Results of the meta-analysis of the correlation between flight personnel and prostate cancer.

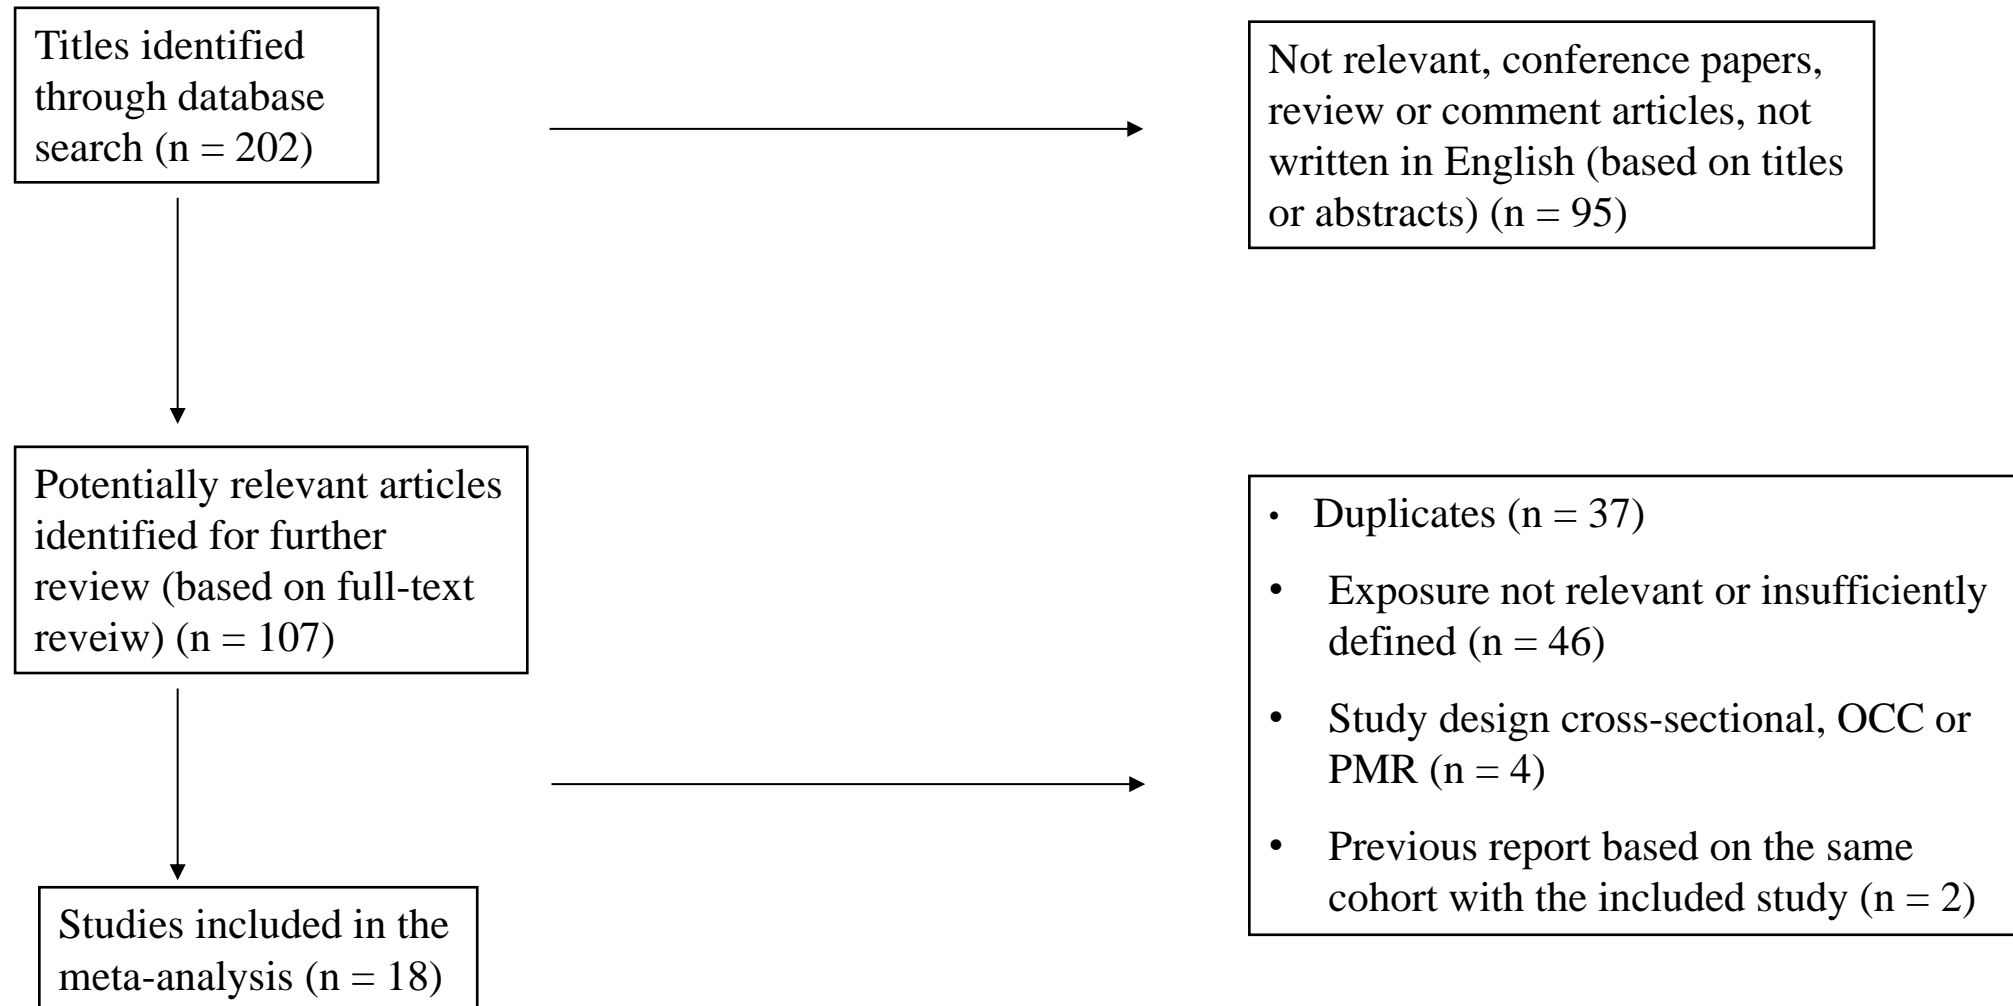

Supplementary Figure SF12. Flowchart for literature of association between physical activity at work and prostate cancer.

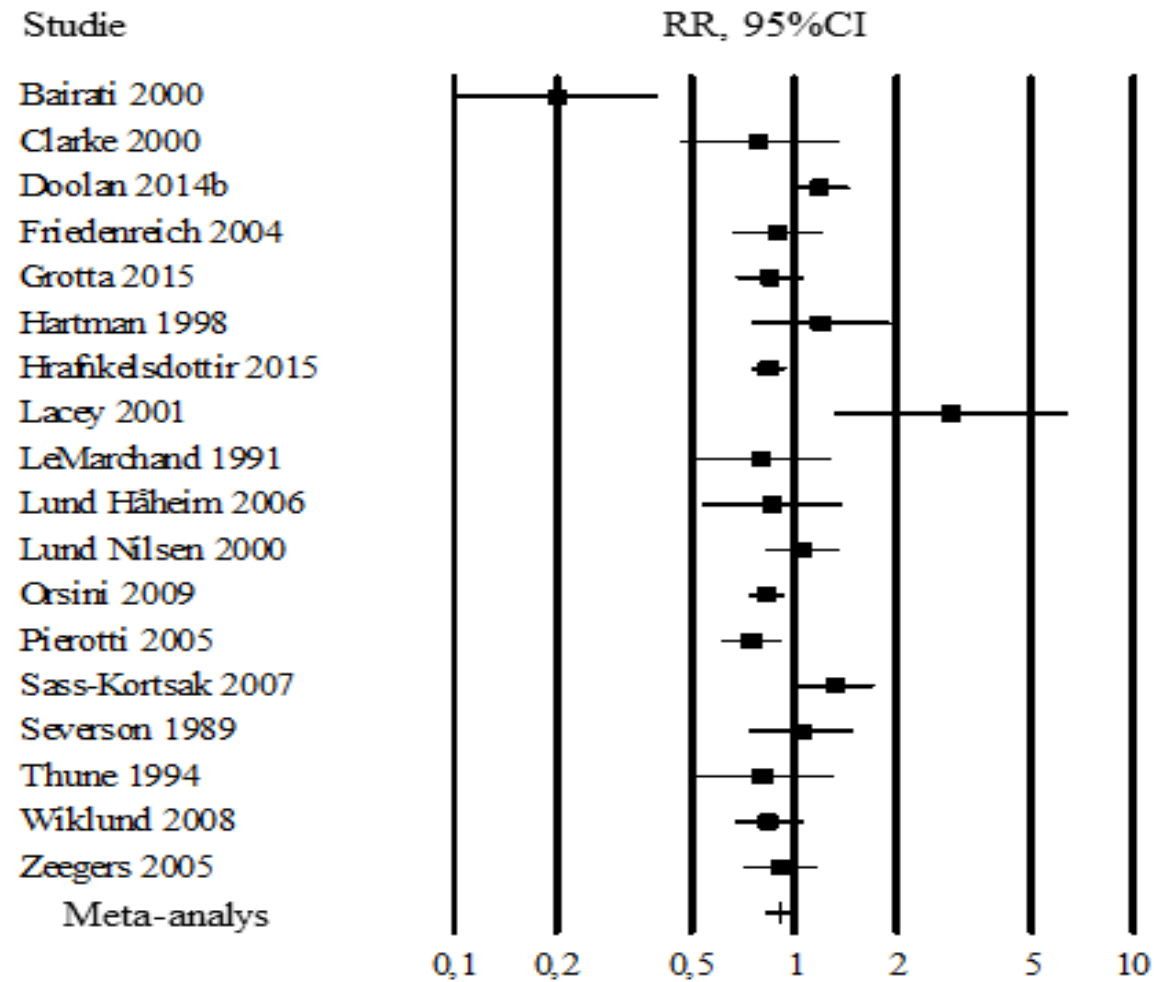

Supplementary Figure SF13. Results of the meta-analysis of the association between physical activity at work and prostate cancer.

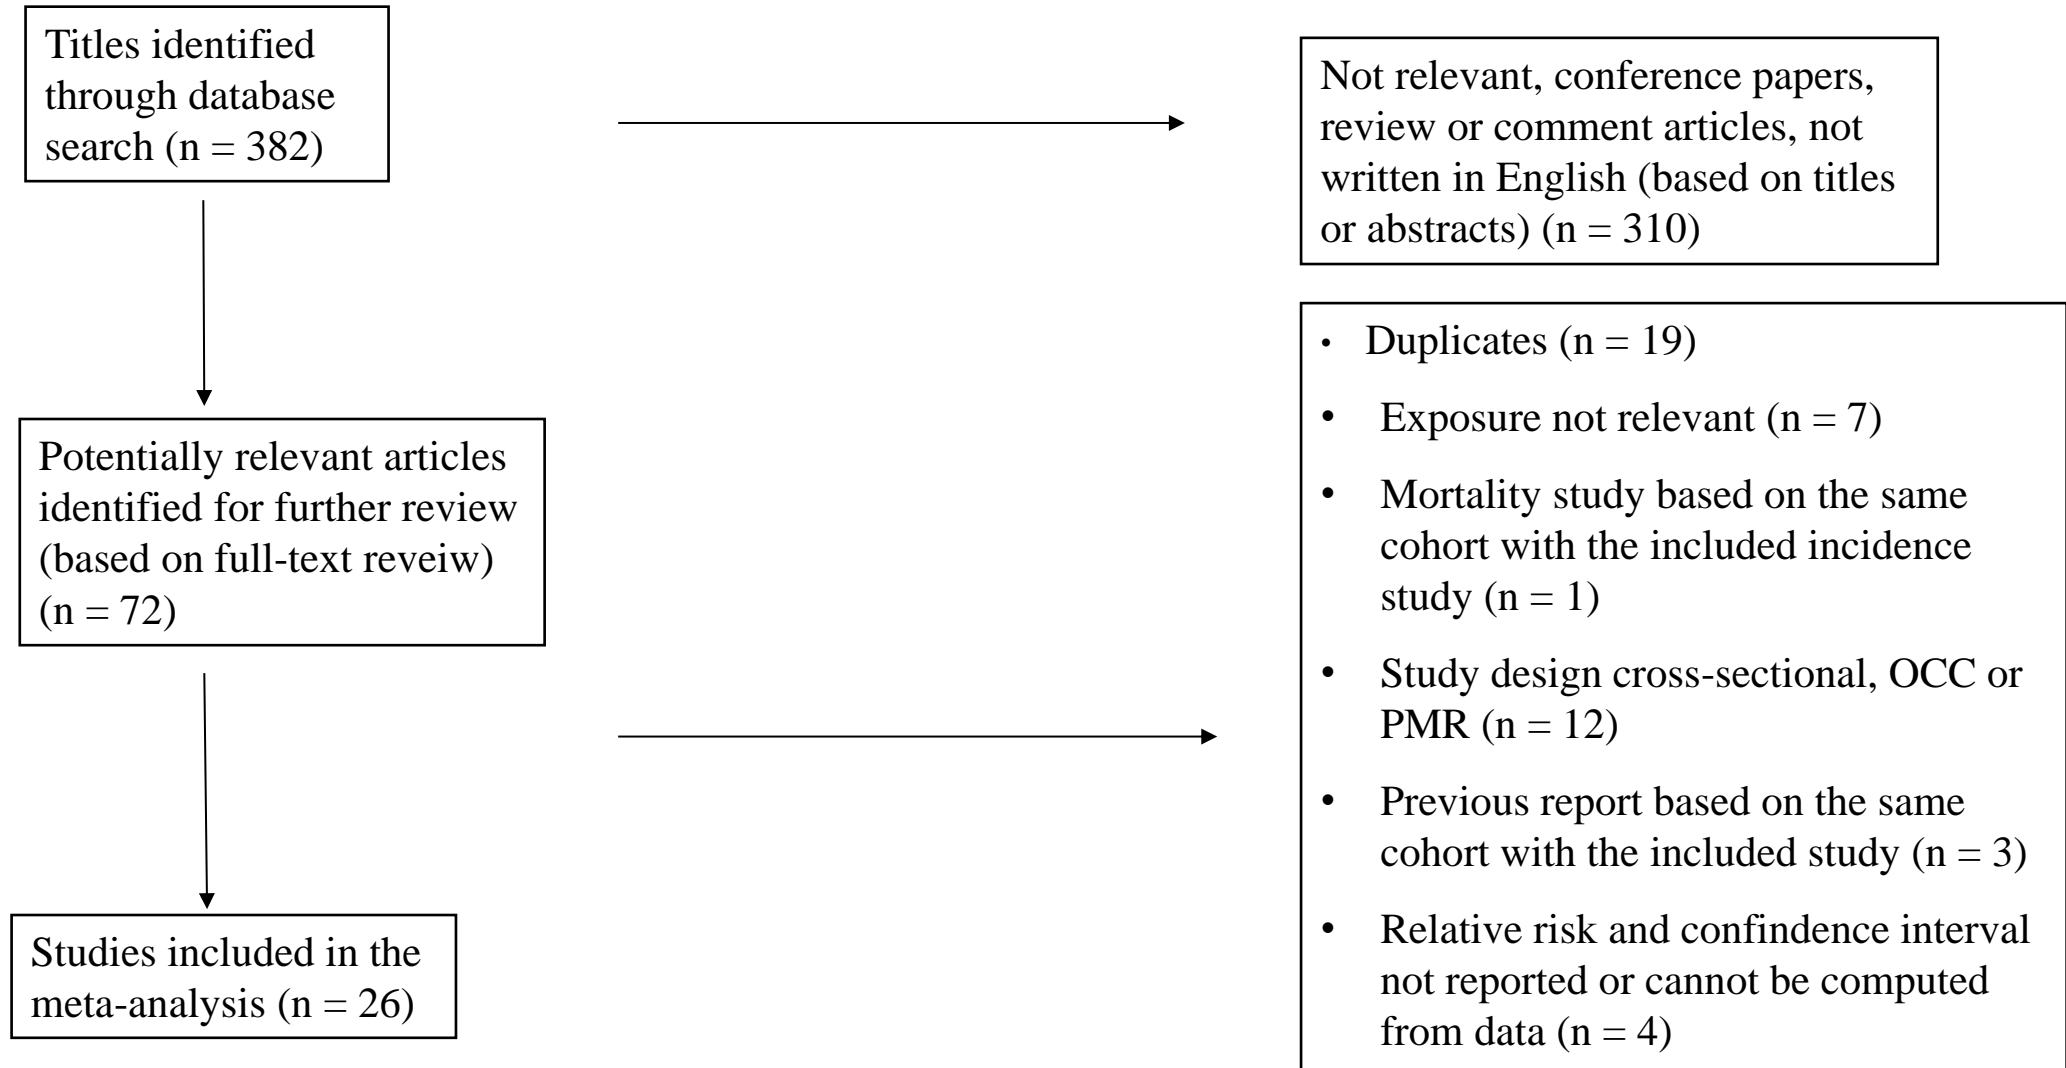

Supplementary Figure SF14. Flowchart for literature search of association between occupation farmers/farm workers and prostate cancer.



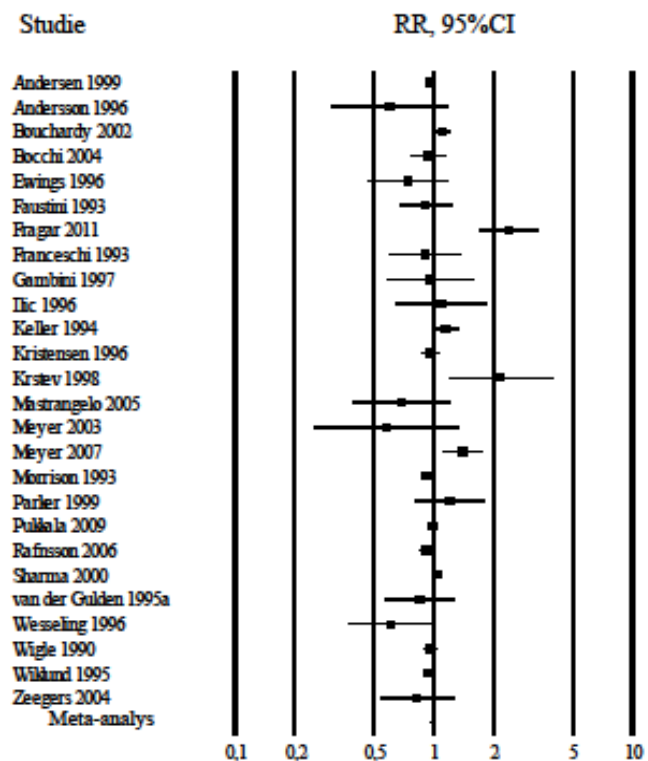

Supplementary Figure SF15. Results of meta-analysis of association between occupation farmers/farm workers and prostate cancer.

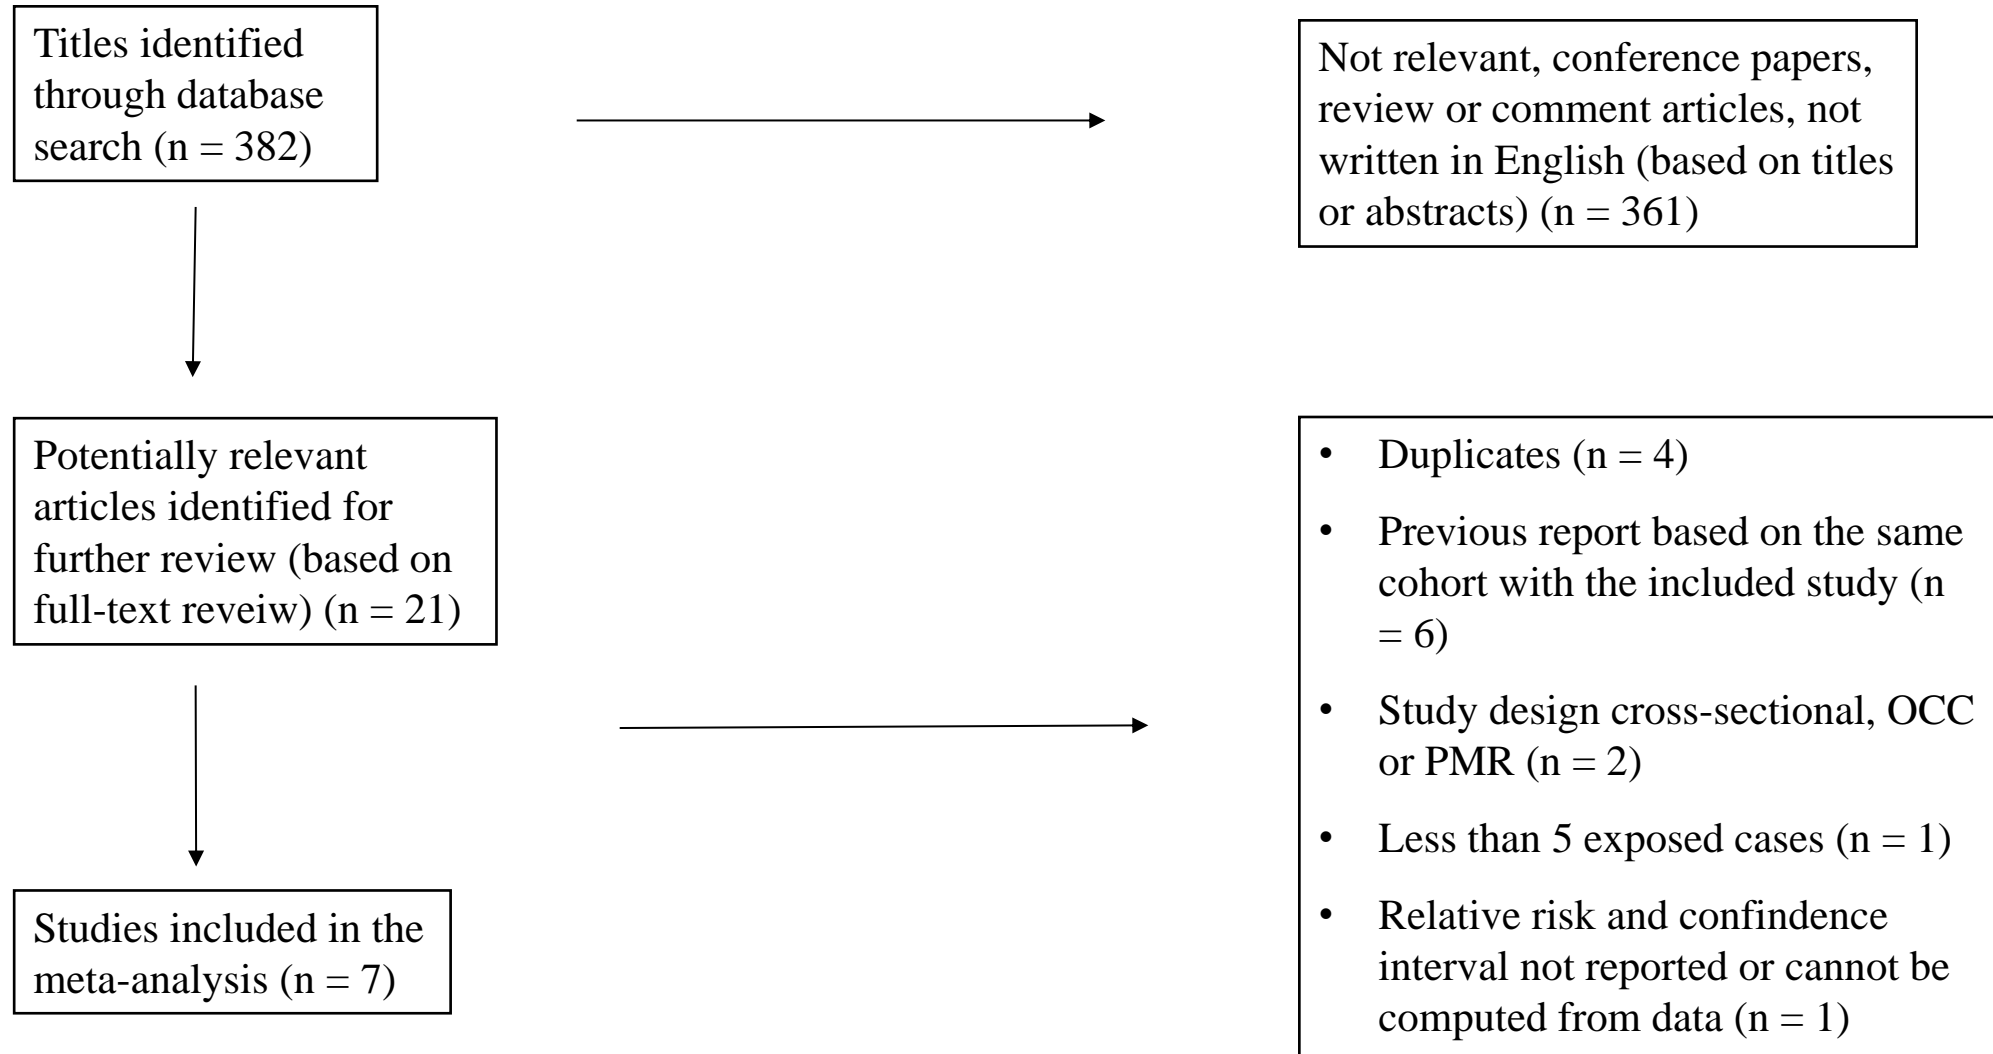

Supplementary Figure SF16. Flowchart for literature search of associations between exposure to organophosphate pesticides and prostate cancer.

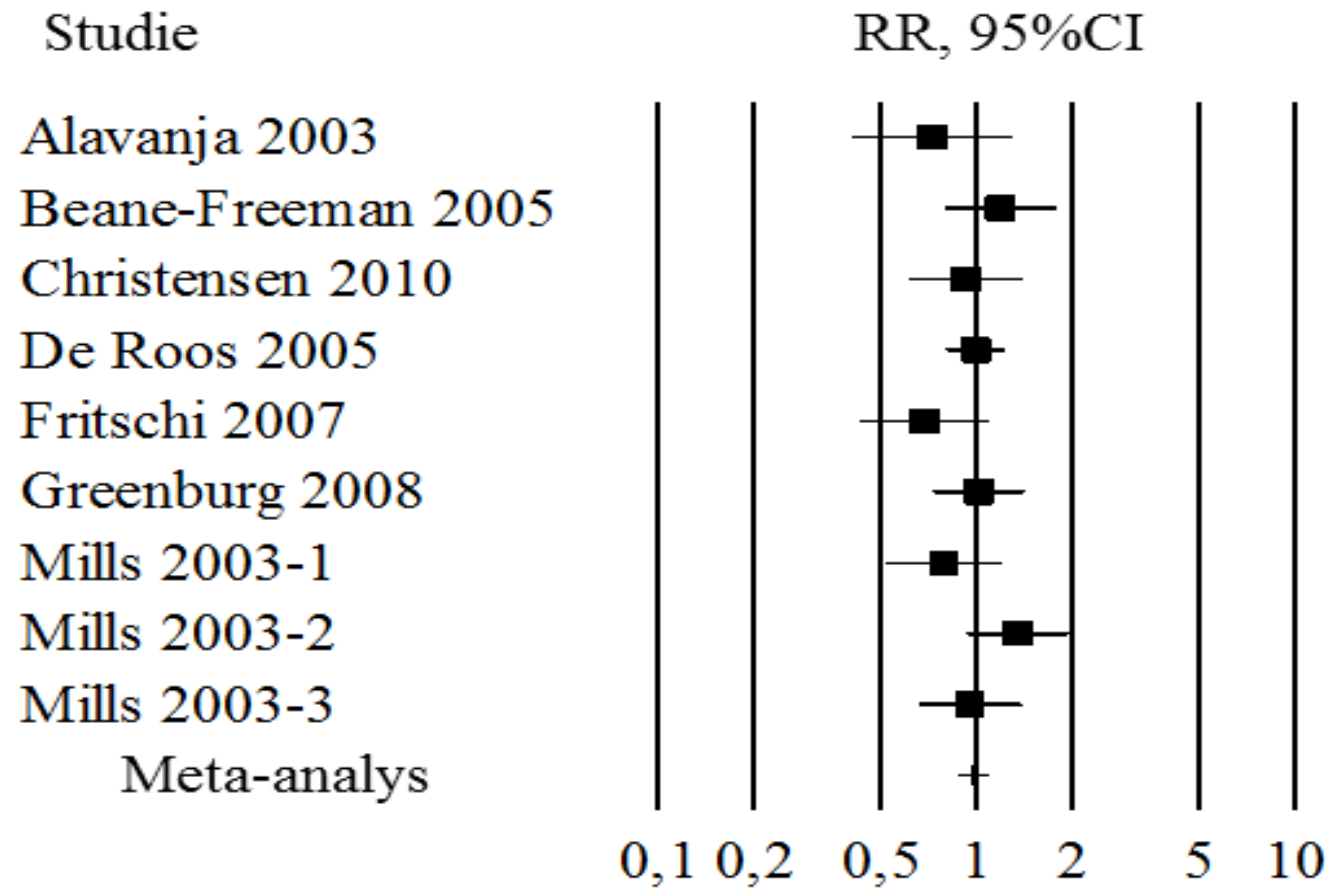

Supplementary Figure SF17. Results of the meta-analysis of the association between organophosphate pesticides and prostate cancer.

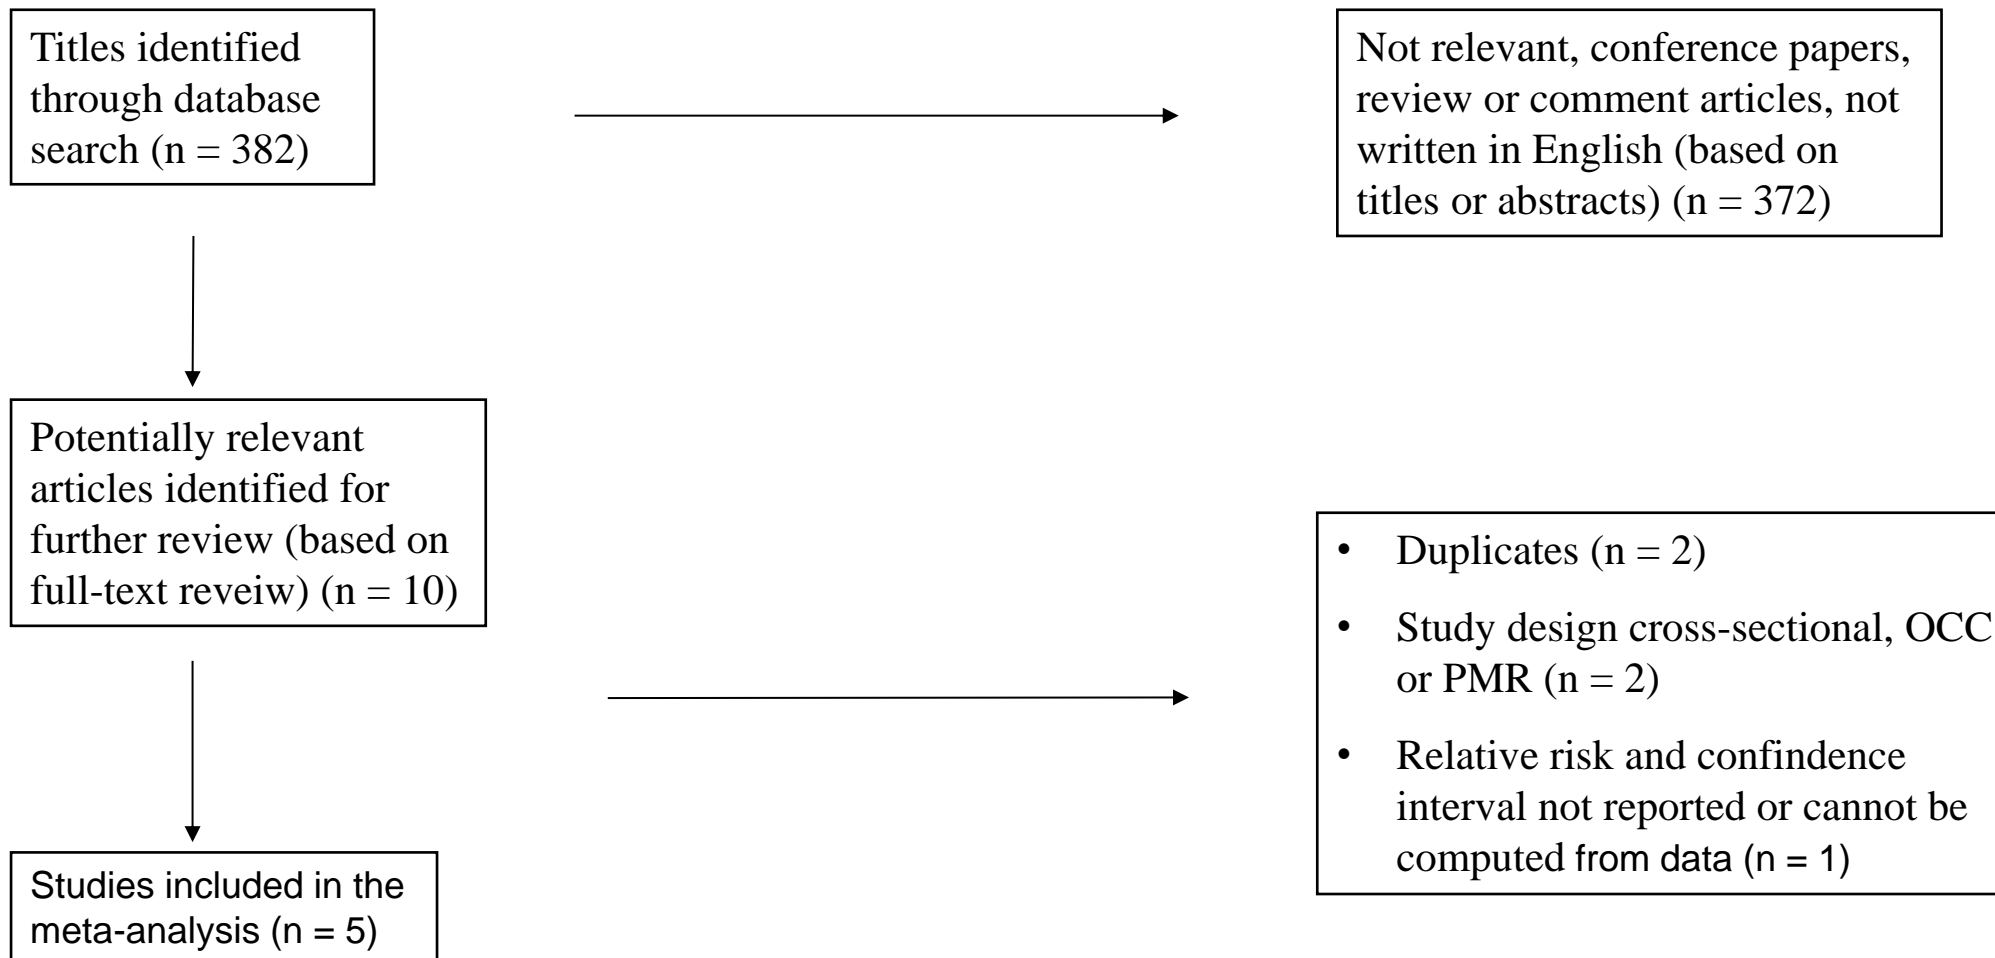

Supplementary Figure SF18. Flowchart for literature search of associations between exposure to carbamates and prostate cancer.

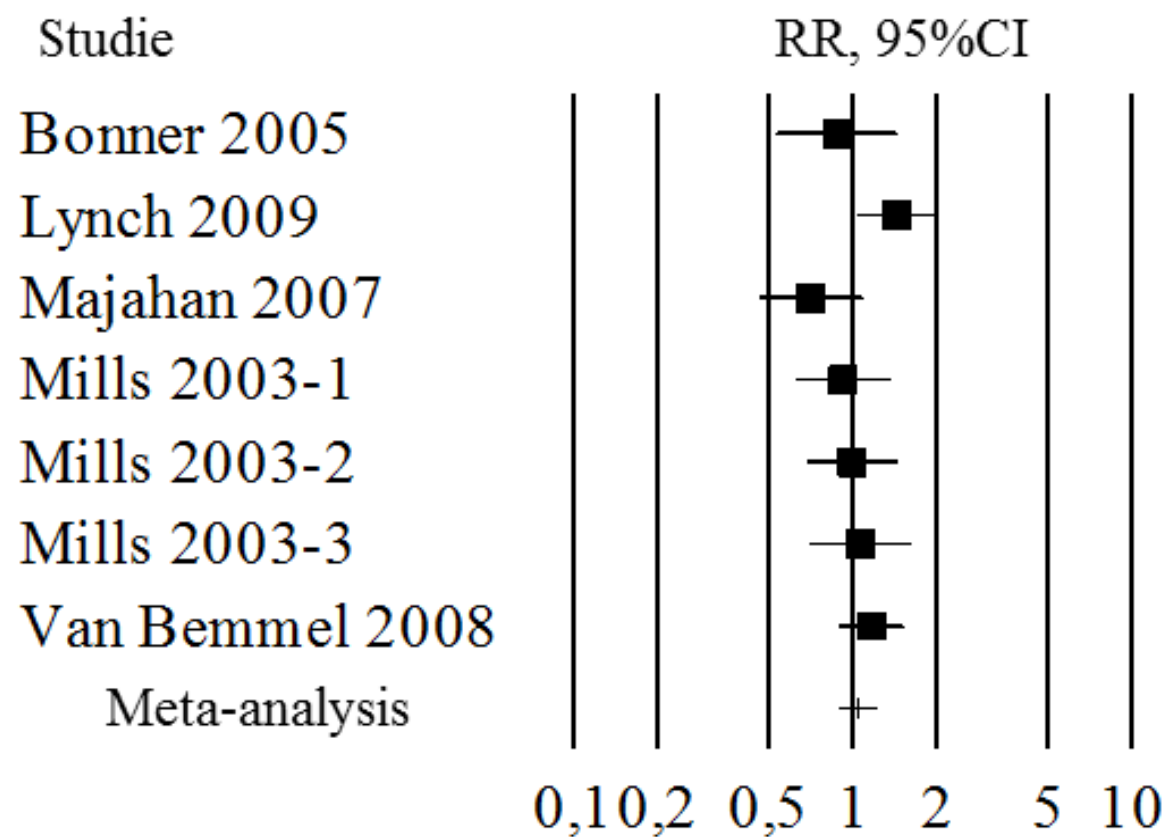

Supplementary Figure SF19. Results of the meta-analysis of the association between carbamates and prostate cancer.

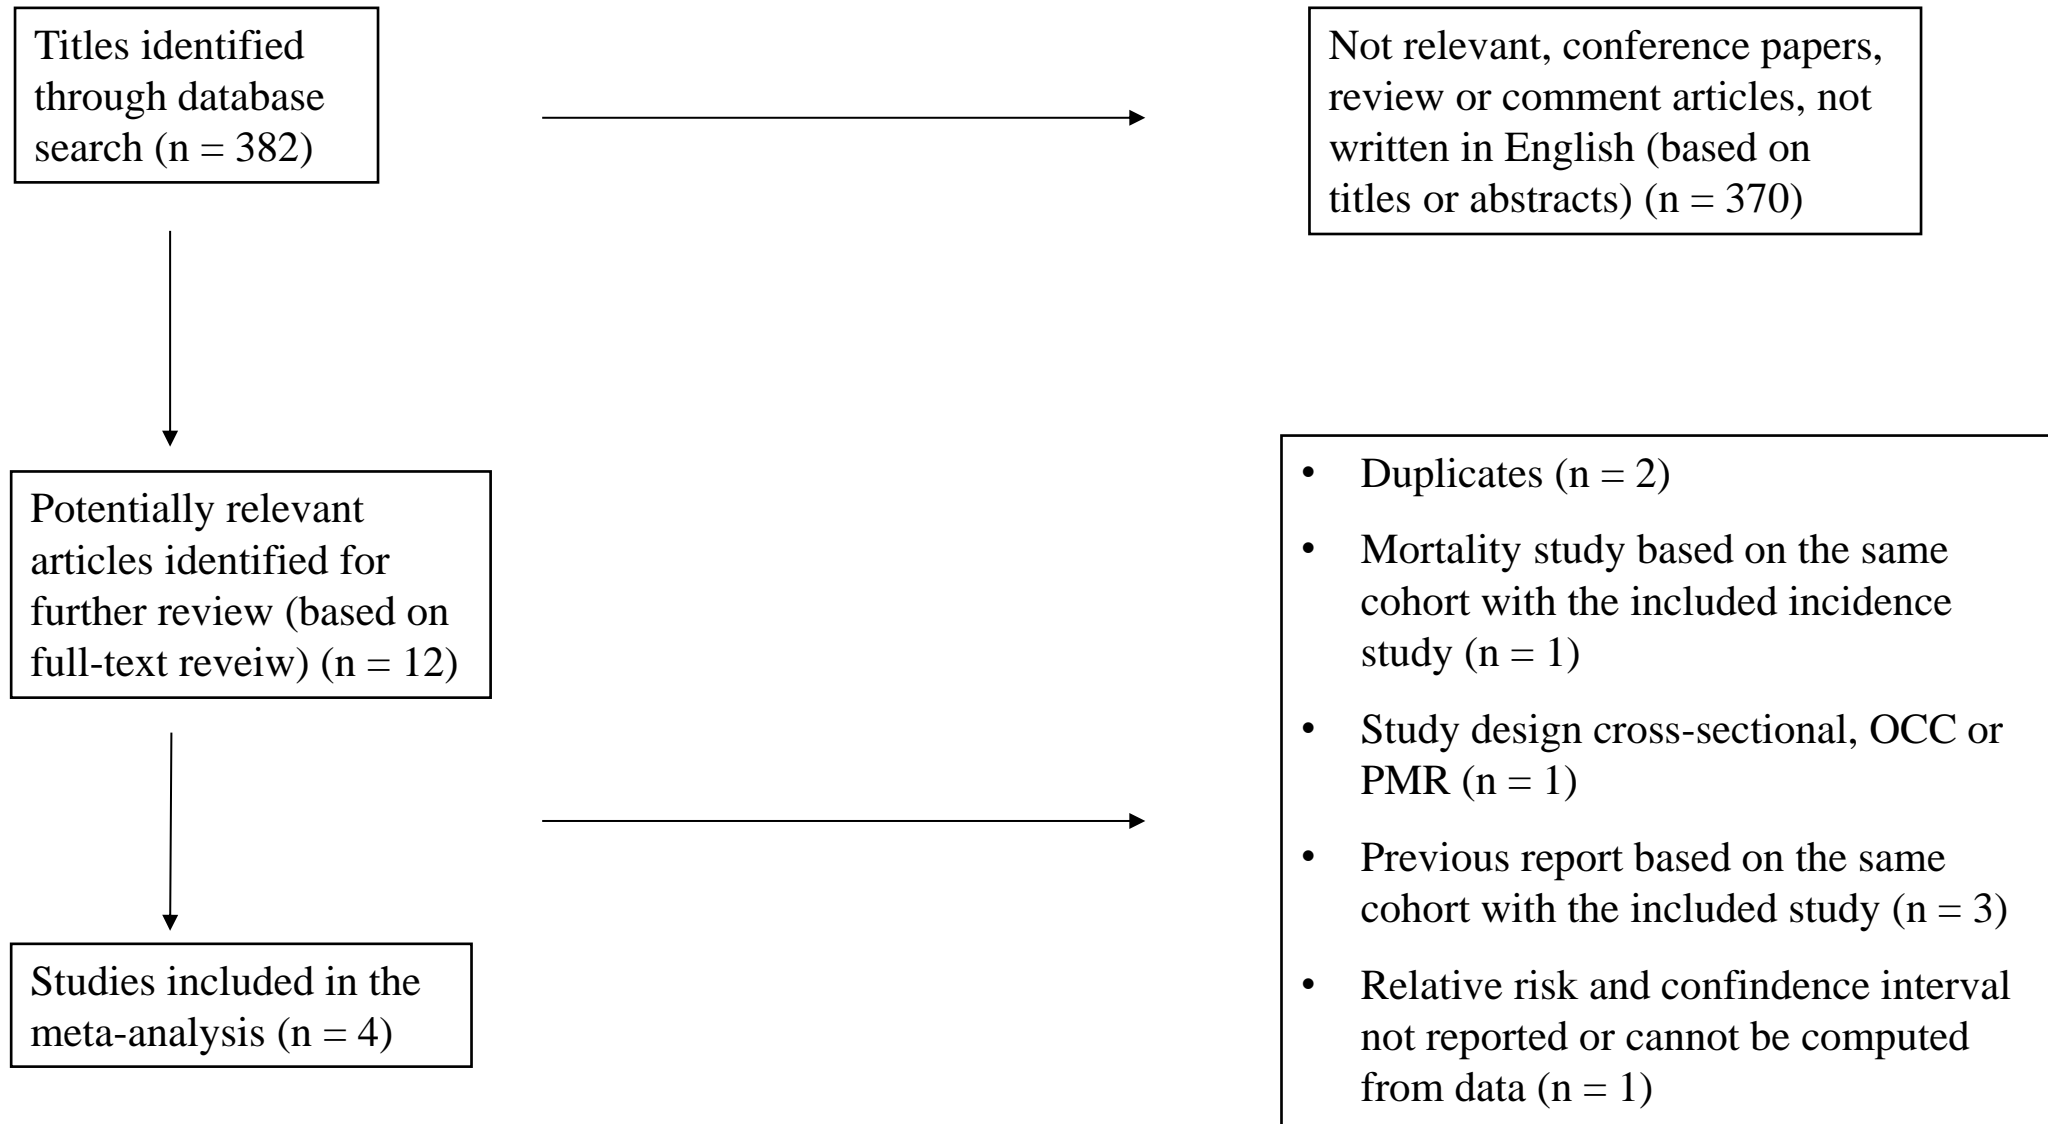

Supplementary Figure SF20. Flowchart for literature search of associations between exposure to triazines and prostate cancer.

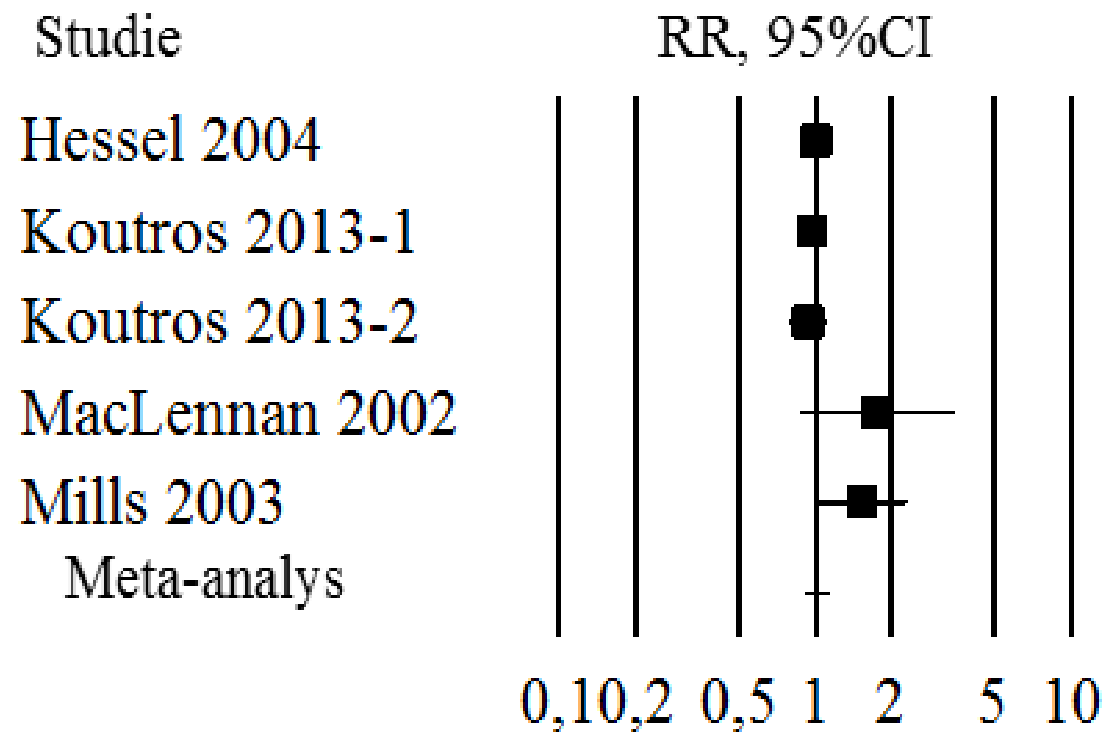

Supplementary Figure SF21. Results of the meta-analysis of the association between triazines and prostate cancer.

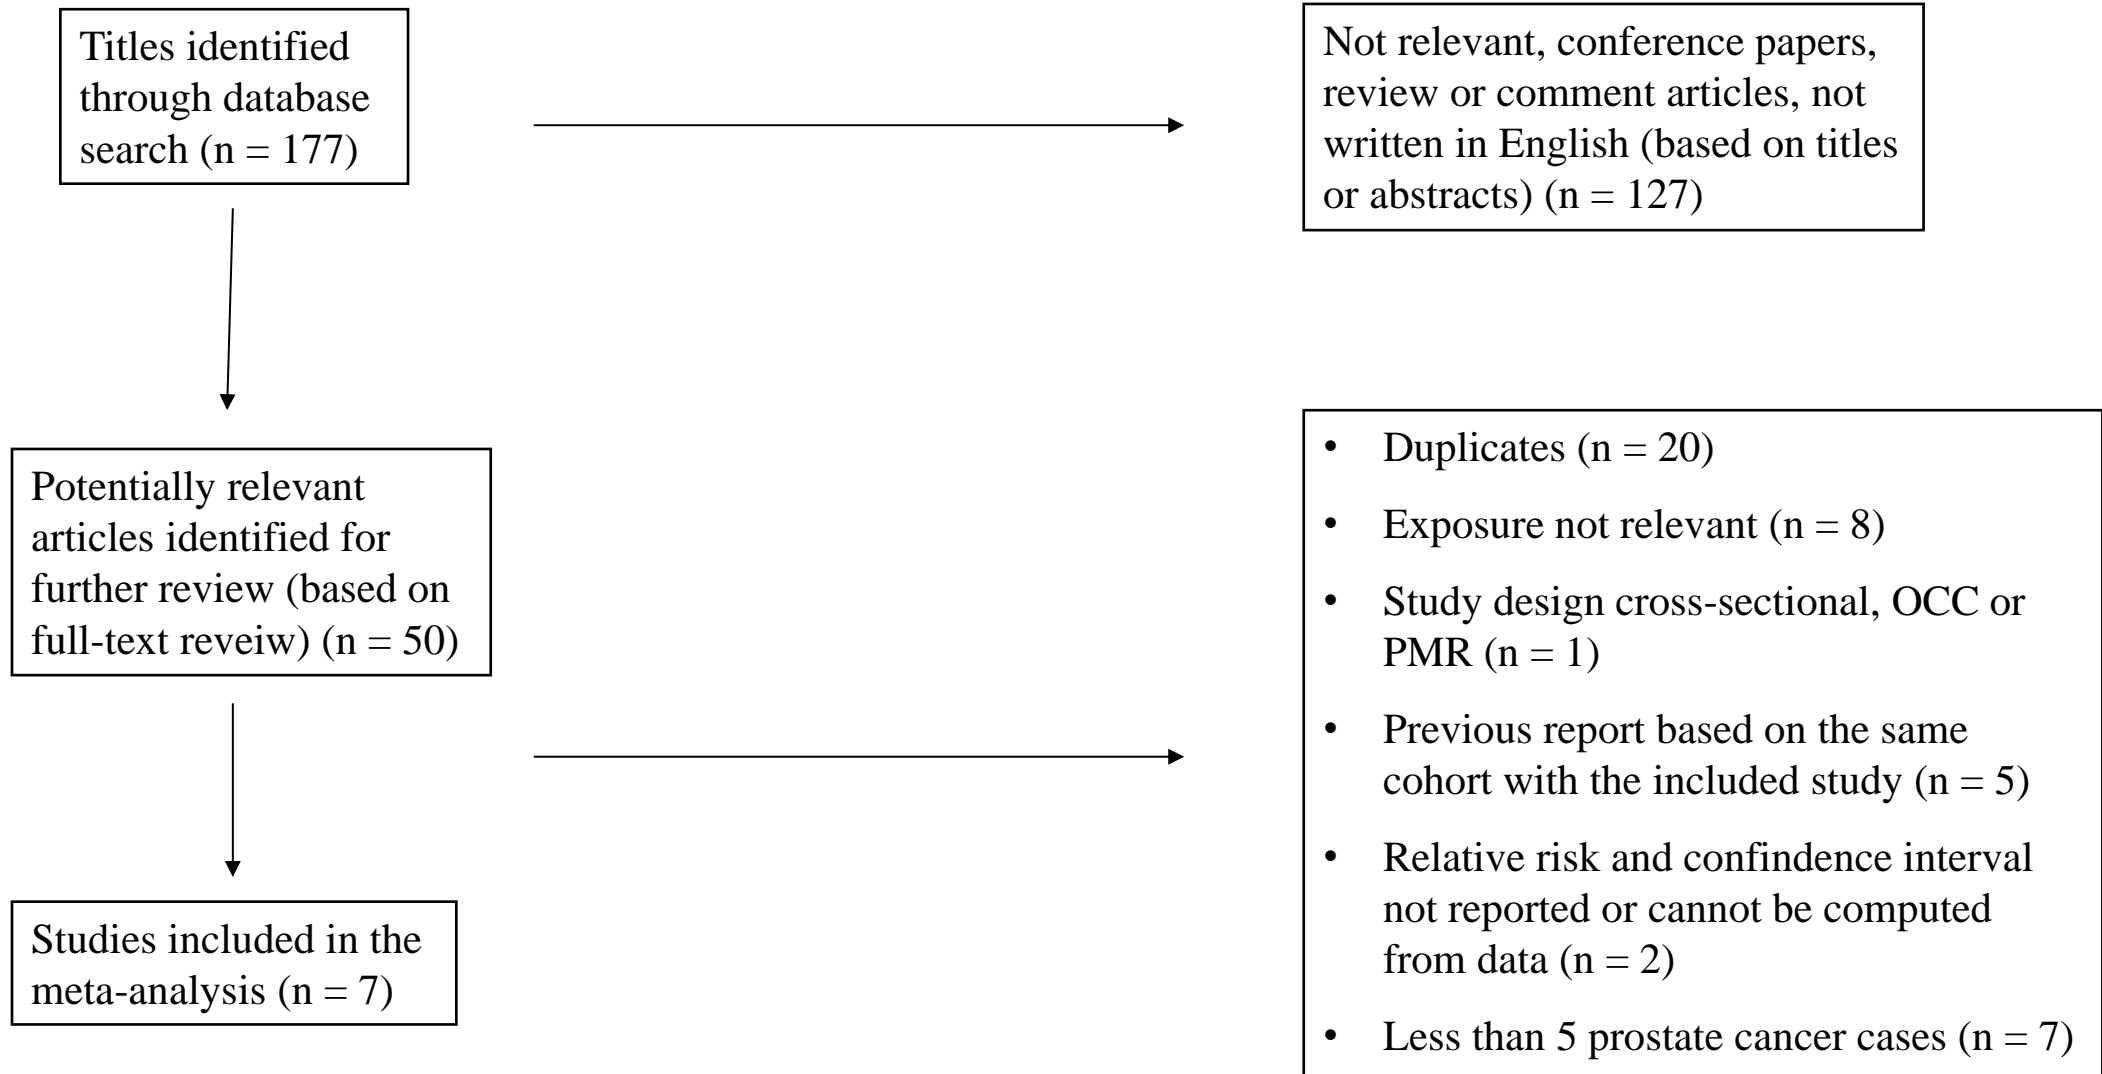

Supplementary Figure SF22. Flowchart for literature search of association between exposure to cadmium and prostate cancer.



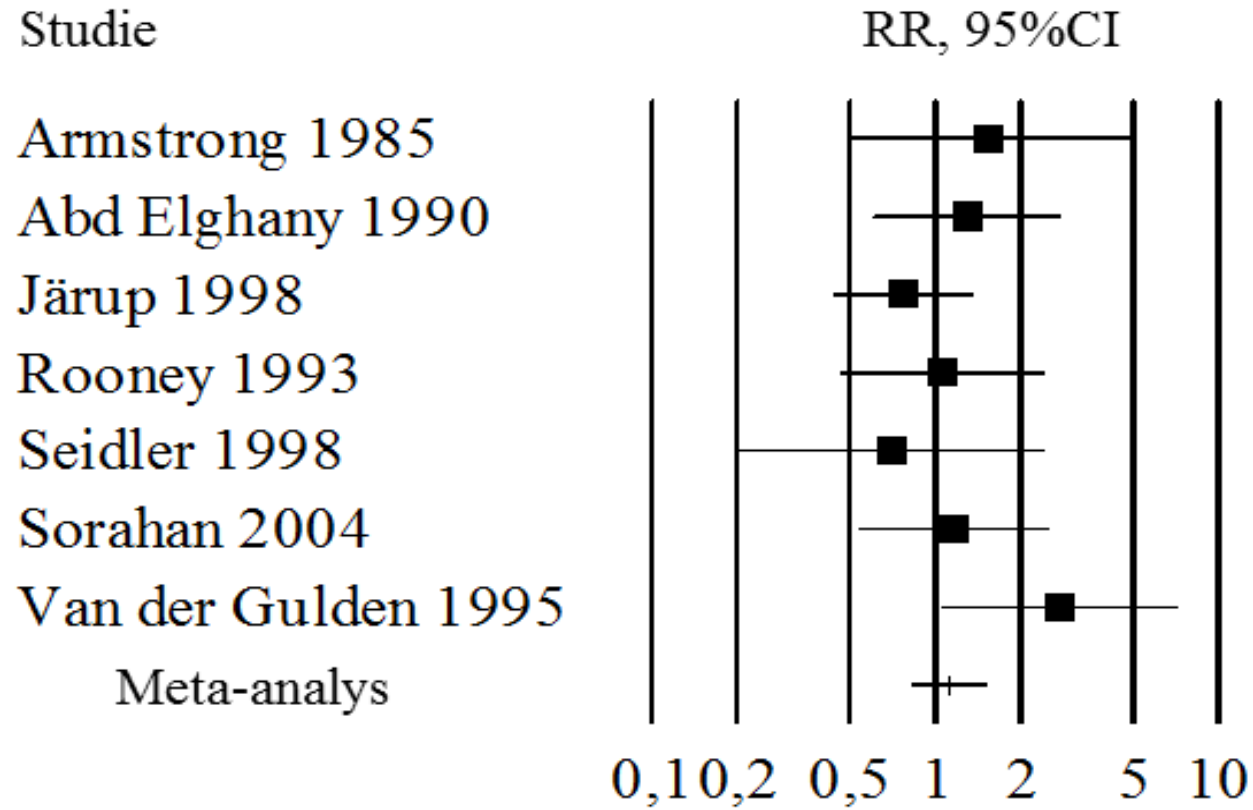

Supplementary Figure SF23. Results of the meta-analysis of the association between cadmium and prostate cancer.

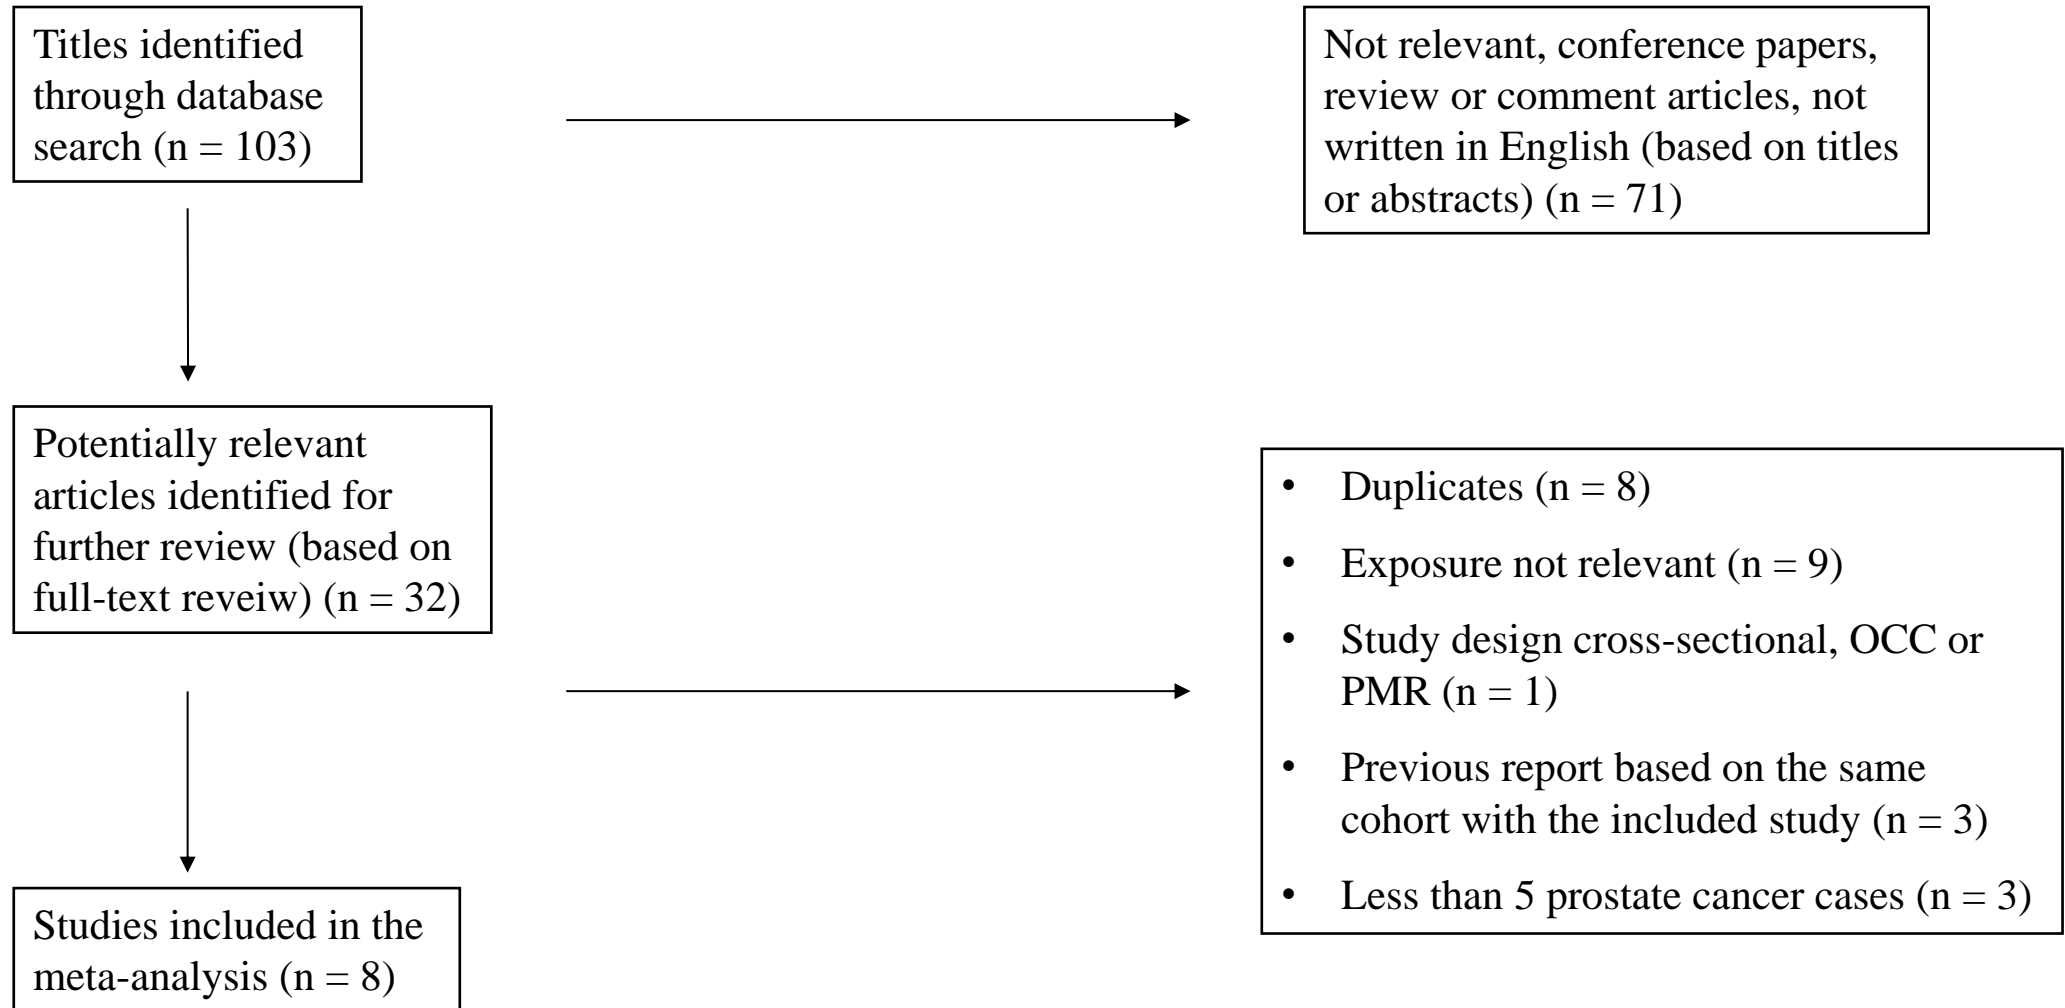

Supplementary Figure SF24. Flowchart for literature search of association between exposure to cutting fluids and prostate cancer.

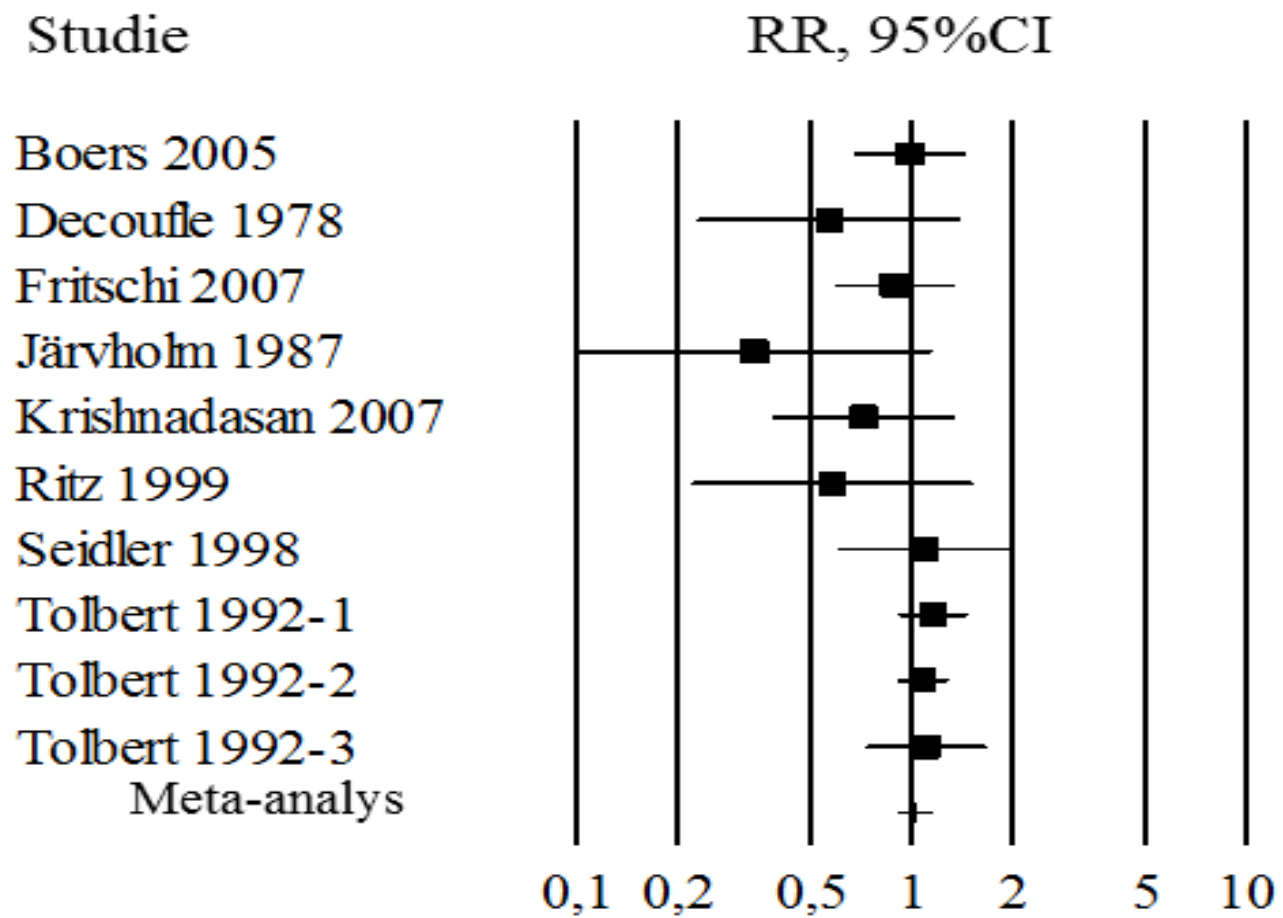

Supplementary Figure SF25. Results of the meta-analysis of the association between cutting fluids and prostate cancer.

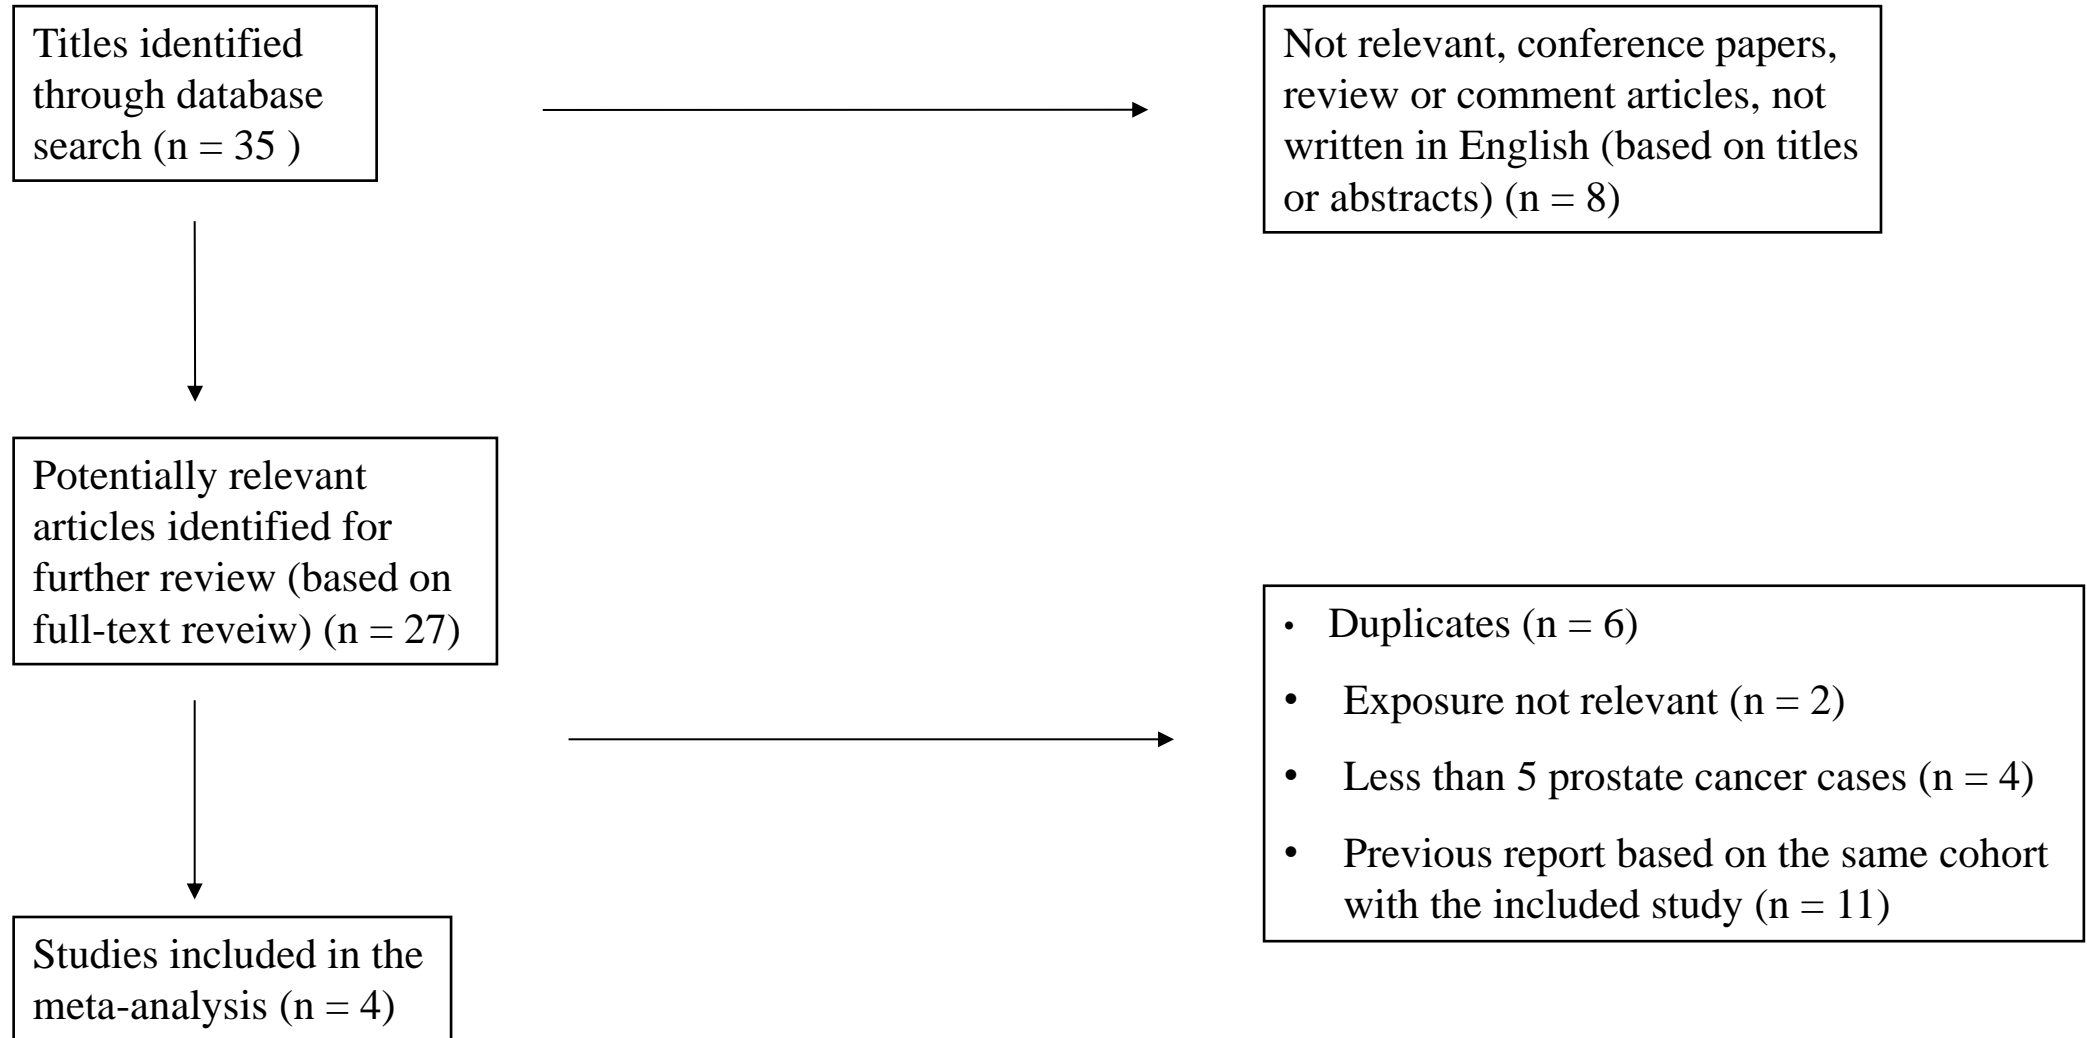

Supplementary Figure SF26. Flowchart for literature search of association between exposure to exposure to acrylonitrile and prostate cancer.

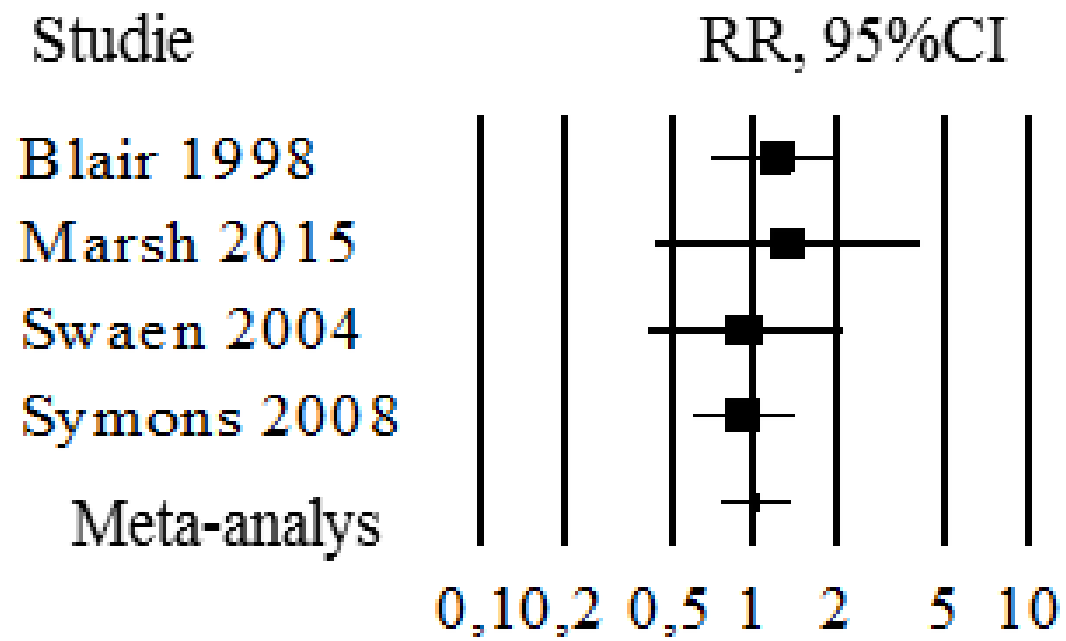

Supplementary Figure SF27. Results of the meta-analysis of the association between acrylonitrile and prostate cancer.

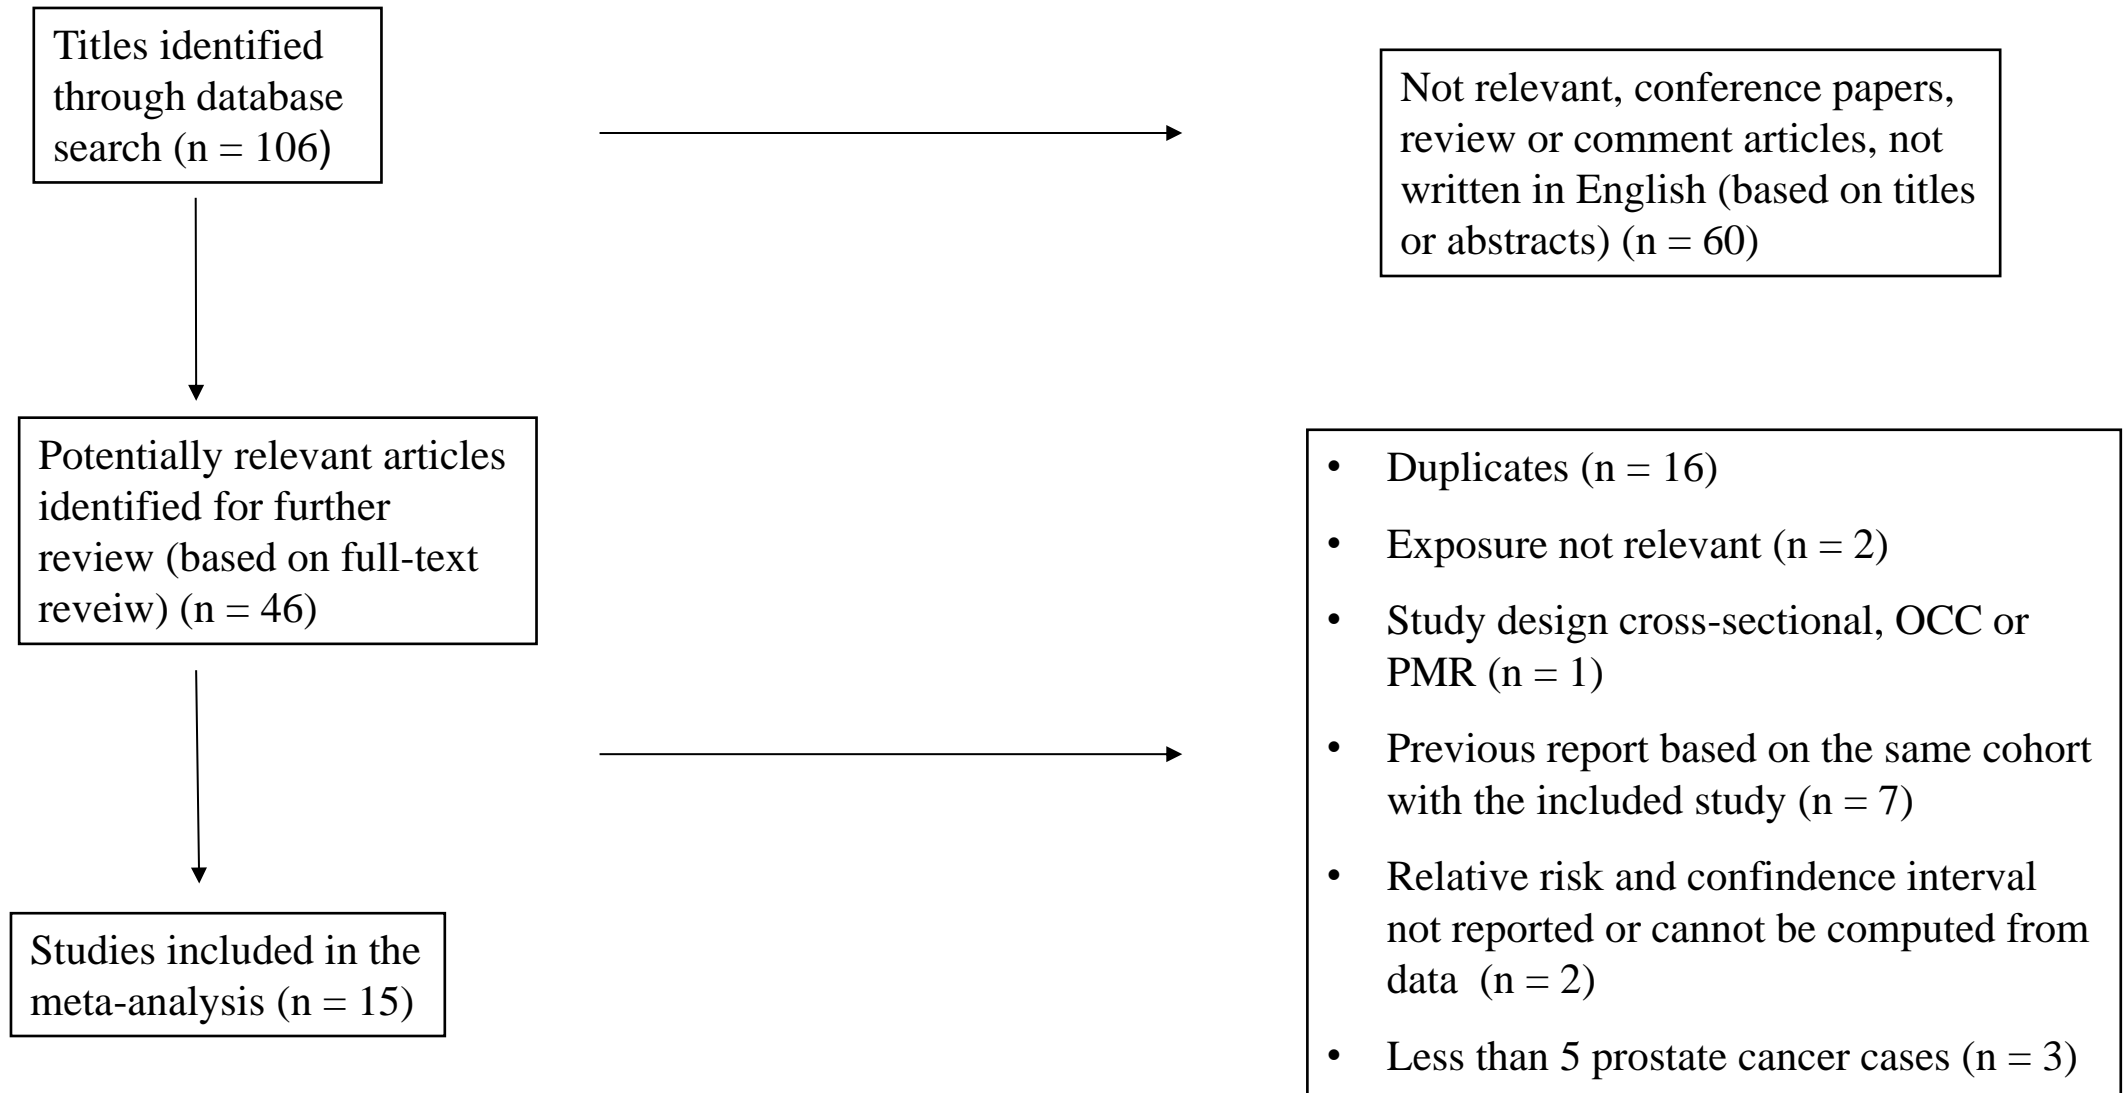

Supplementary Figure SF28. Flowchart for literature search of association between exposure in rubber industry and prostate cancer.

Study name

Odds ratio and 95% CI

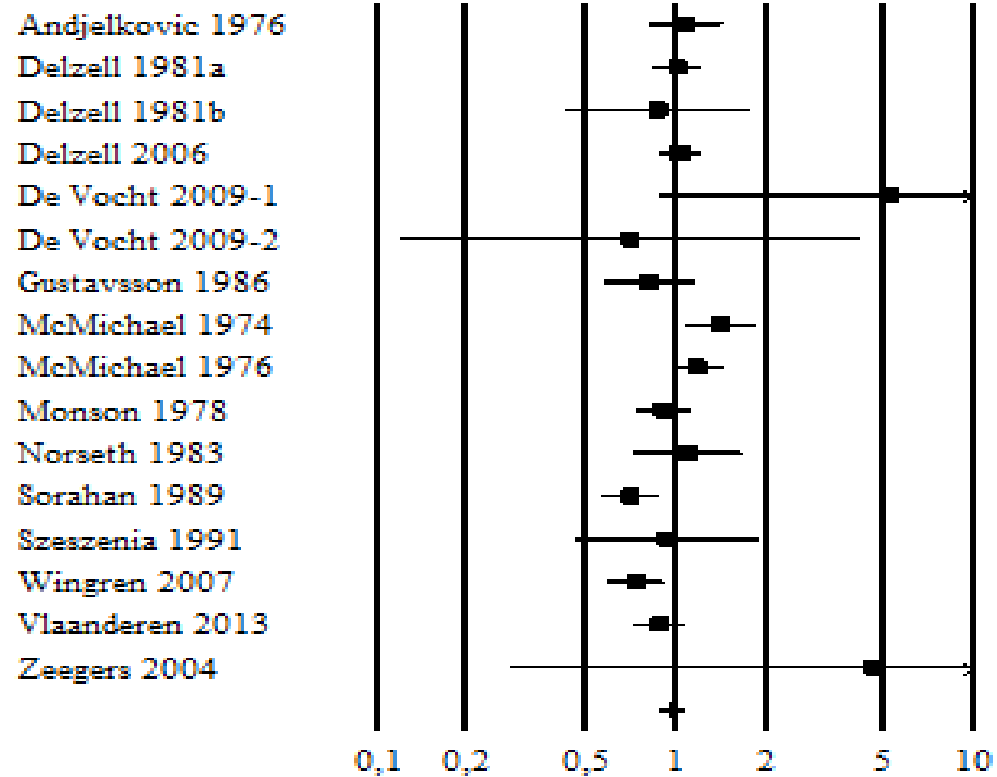

Supplementary Figure S29. Results of the meta-analysis of the association between exposure in rubber industry and prostate cancer.

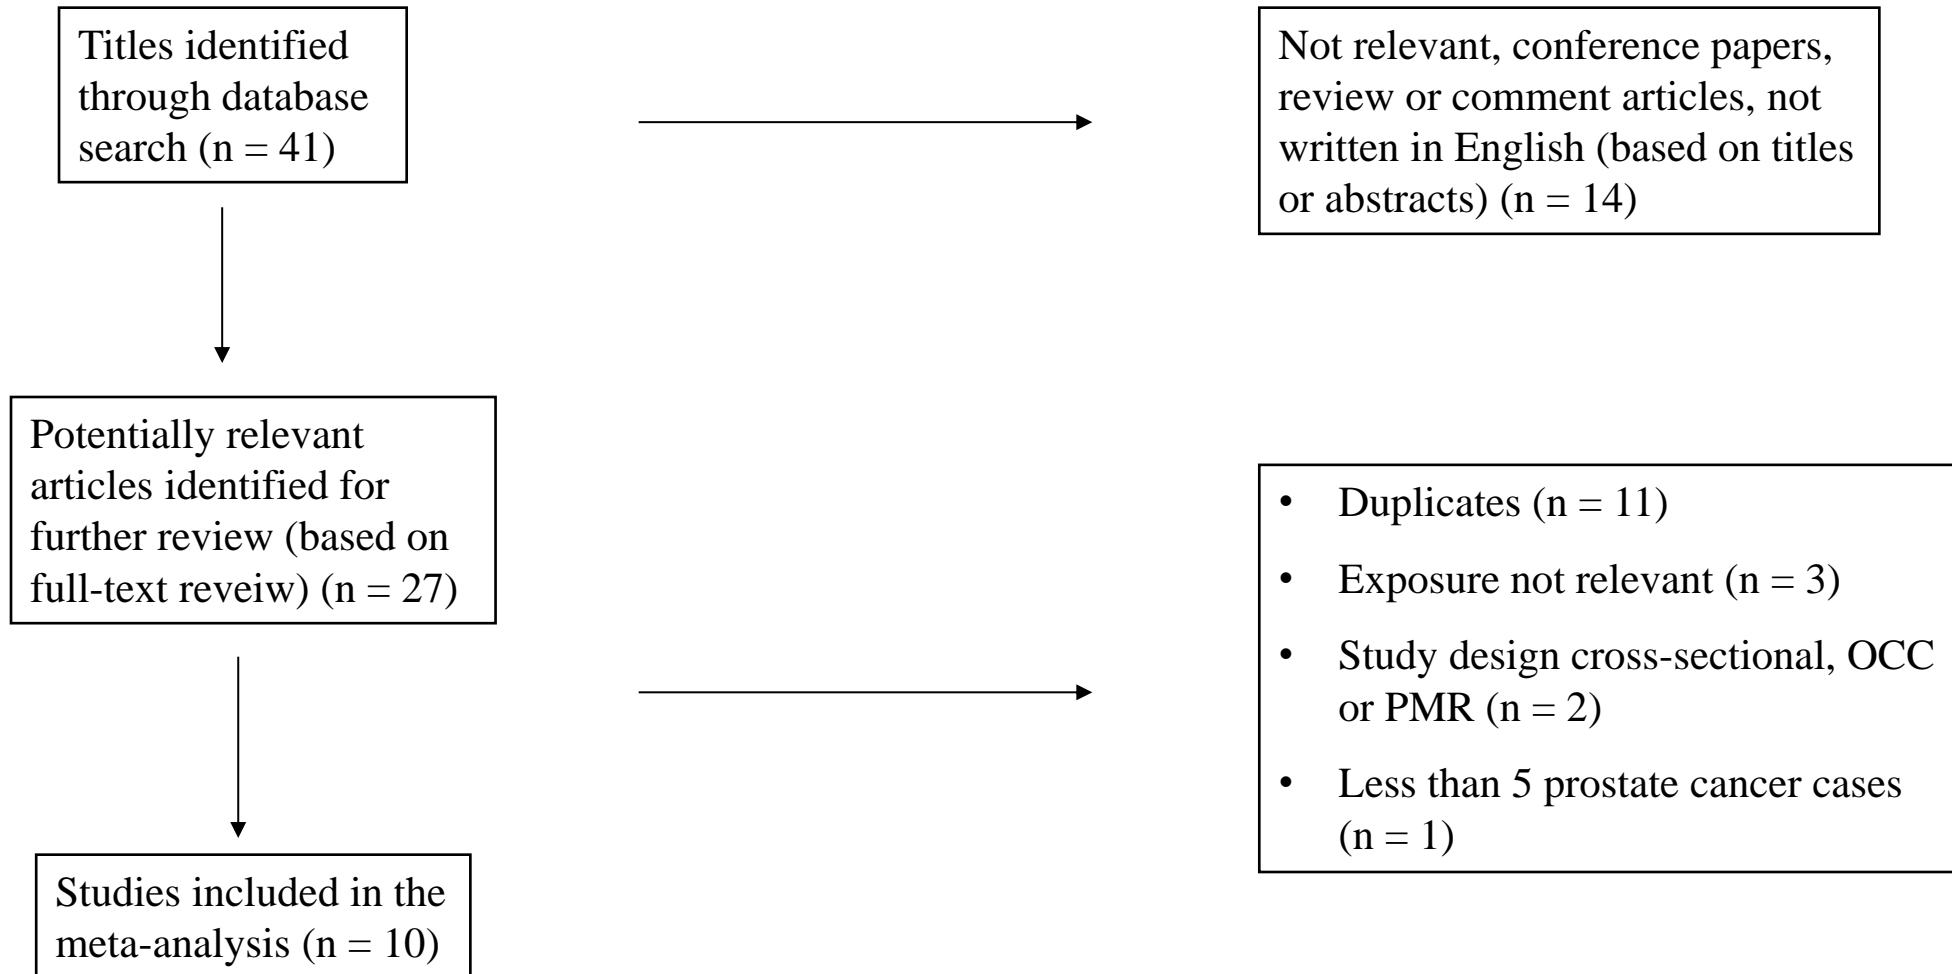

Supplementary Figure SF30. Flowchart for literature search of association between exposure to whole-body vibration and prostate cancer.



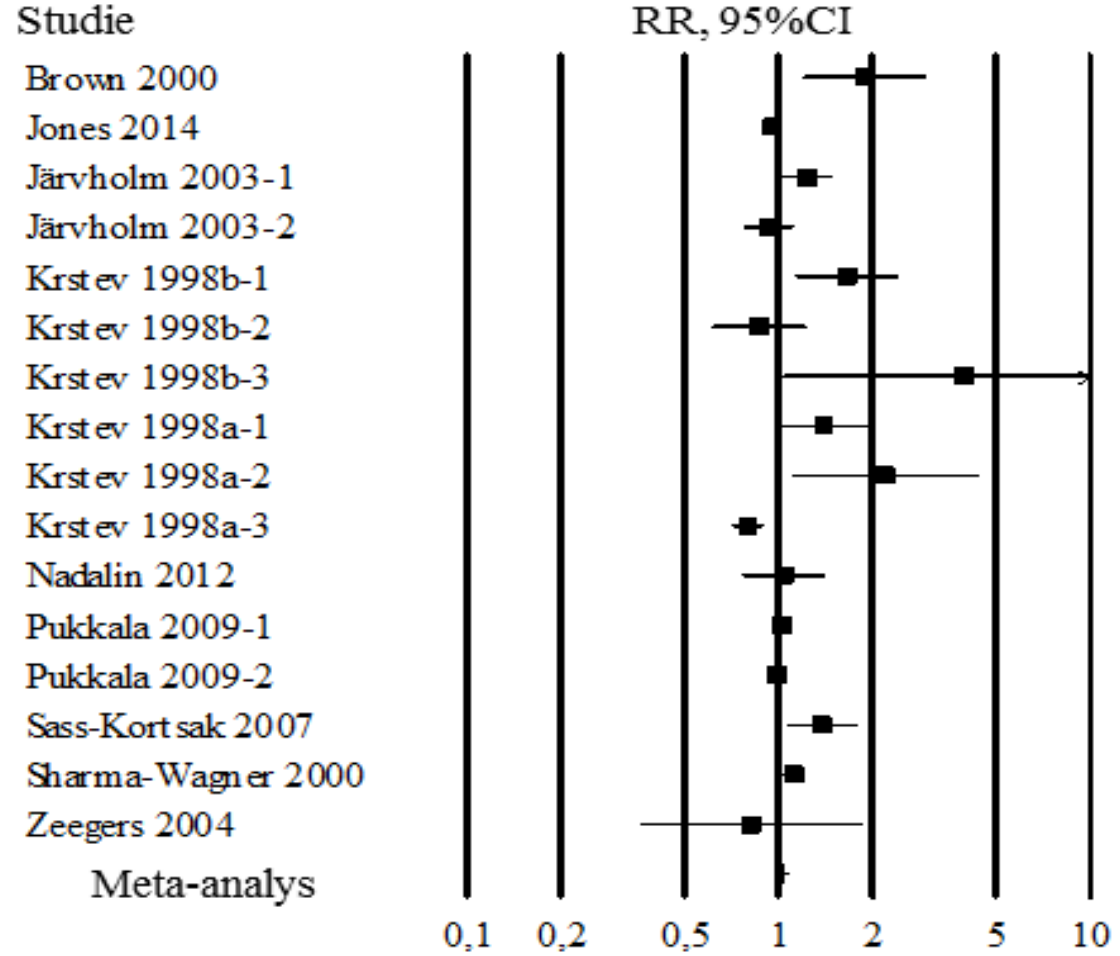

Supplementary Figure SF31. Results of the meta-analysis of the association between whole-body vibration and prostate cancer.

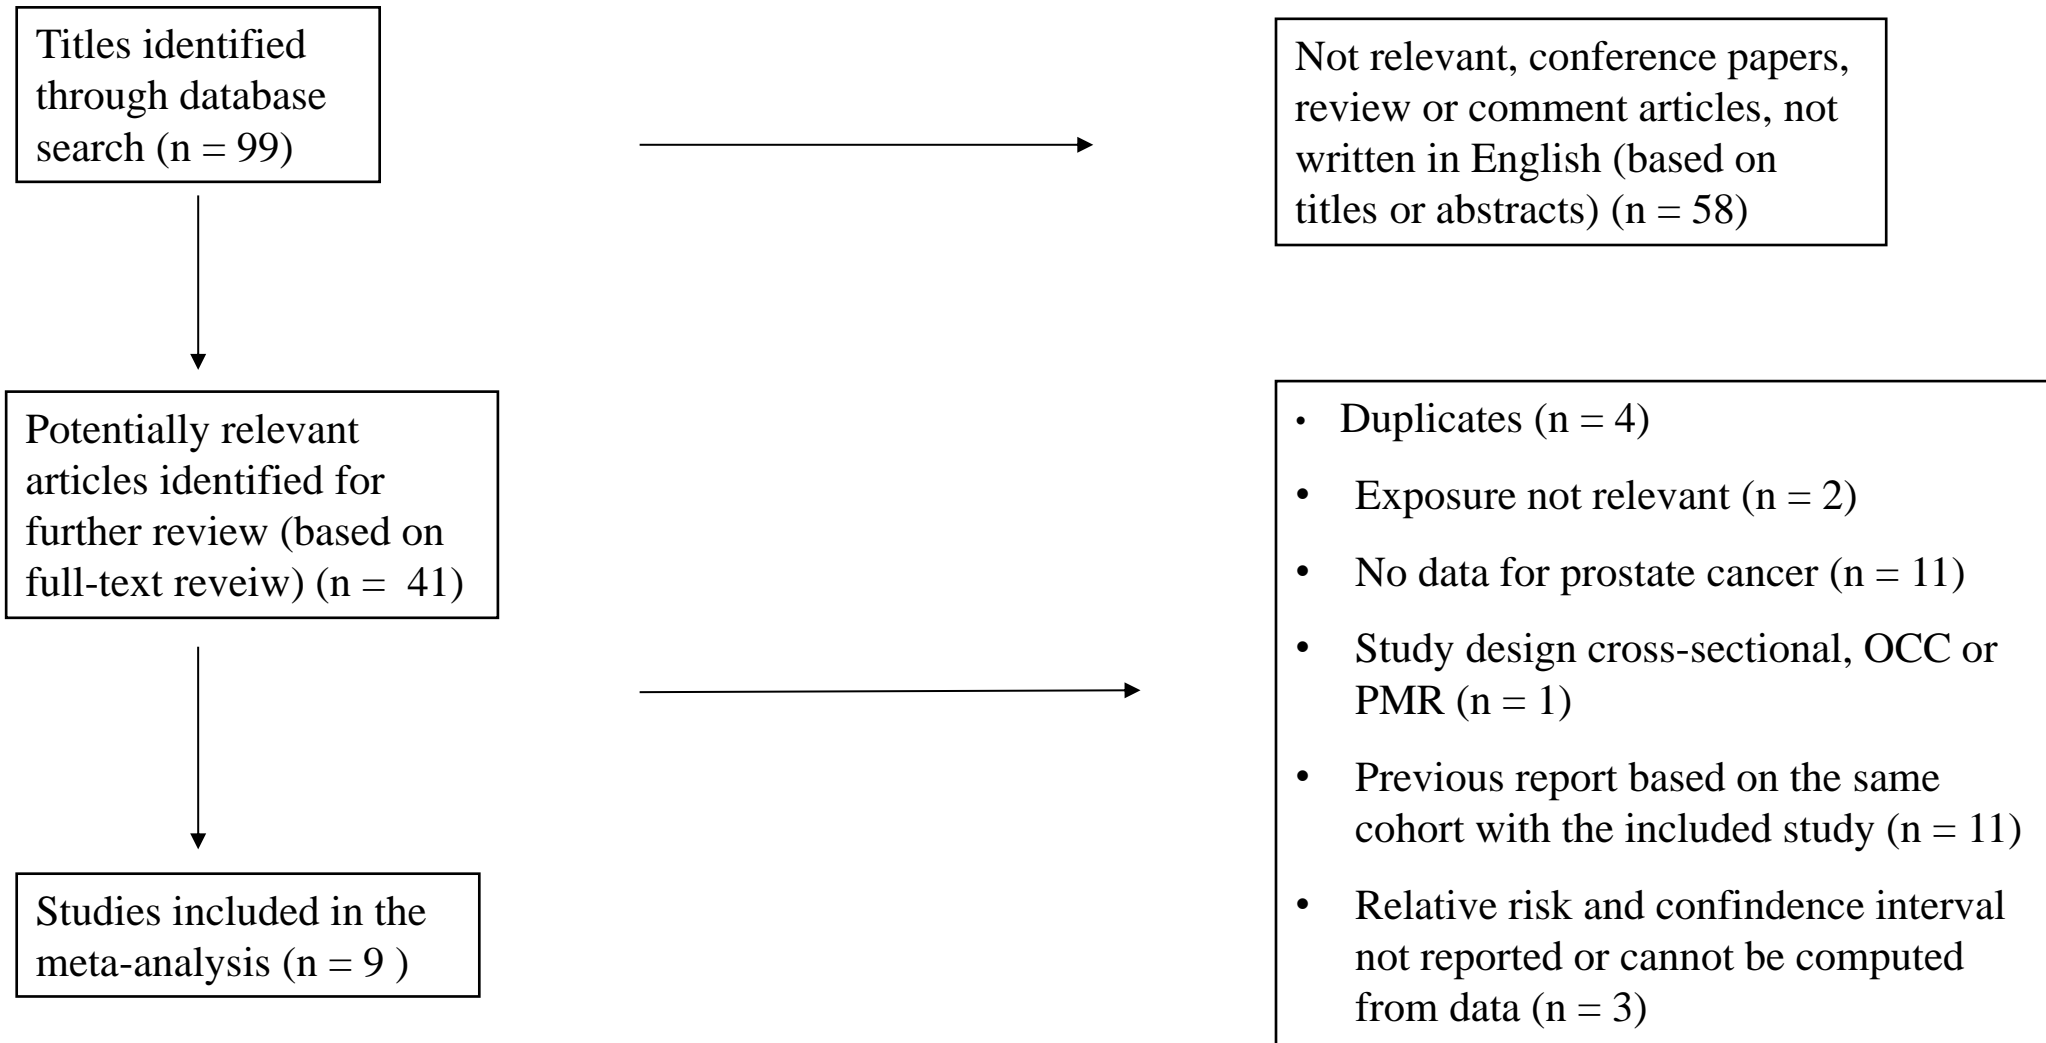

Supplementary Figure SF32. Flowchart for literature search of association between exposure to ionizing radiation and prostate cancer.

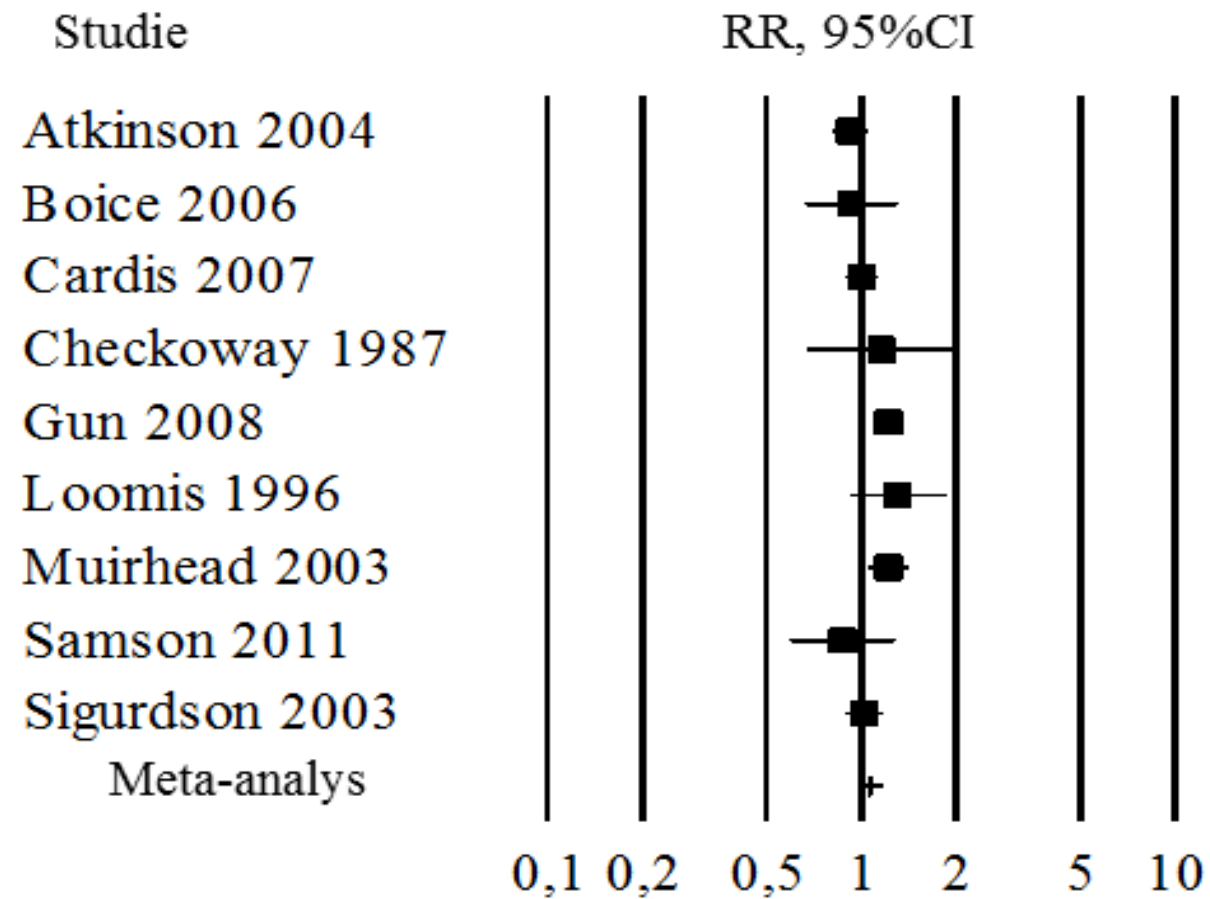

Supplementary Figure SF33. Results of the meta-analysis of the association between ionizing radiation and prostate cancer.
